1 **Effect of chlorination and pressure flushing of drippers fed by reclaimed wastewater on biofouling**

2 *Kévin Lequette<sup>1-2</sup>, Nassim Ait-Mouheb<sup>2</sup>, Nicolas Adam<sup>3</sup>, Marine Muffat-Jeandet<sup>2</sup>, Valérie*  
3 *Bru-Adan<sup>1</sup>, Nathalie Wéry<sup>1</sup>*

4 <sup>1</sup>*INRAE, University of Montpellier, LBE, 102, Avenue des Etangs, 11100 Narbonne, France;*

5 <sup>2</sup>*INRAE, University of Montpellier, UMR G-EAU, Avenue Jean-François Breton, 34000*

6 *Montpellier, France ; <sup>3</sup>University of Toulouse, Centre de recherche Cerveau et Cognition,*

7 *31000 Toulouse, France*

8 *Correspondence: nathalie.wery@inrae.fr*

9 *Tel.: +33 (0)4 68 42 51 86*

10

11 **Highlights**

- 12 ● The fouling of drippers is a bottleneck for drip irrigation using reclaimed wastewater
- 13 ● Biofouling was lowest when chlorination was combined with pressure flushing
- 14 ● The  $\beta$ -Proteobacteria and Firmicutes contain chlorine resistant bacteria
- 15 ● The decrease of Chloroflexi by chlorination was transitory
- 16 ● The bacterial community was resilient after the interruption of cleaning events

17

18

19

20

21

22

23 **Abstract**

24           Dripper clogging reduces the performance and service life of a drip irrigation system.  
25   The impact of chlorination (1.5 ppm of free chlorine during 1 h application) and pressure  
26   flushing (0.18 MPa) on the biofouling of non-pressure-compensating drippers fed by real  
27   reclaimed wastewater was studied at lab scale using Optical Coherence Tomography. The effect  
28   of these treatments on microbial composition (bacteria and eukaryotes) was also investigated  
29   by High-throughput DNA sequencing. Biofouling was mainly observed in inlet, outlet and  
30   return areas of the drippers. Chlorination limited biofilm development mainly in the mainstream  
31   of the milli-labyrinth channel. It was more efficient when combined with pressure flushing.  
32   Moreover, chlorination was more efficient in maintaining the water distribution uniformity. It  
33   reduced the bacterial concentration and the diversity of the dripper biofilms compared to the  
34   pressure flushing method. This method strongly modified the microbial communities,  
35   promoting chlorine-resistant bacteria such as *Comamonadaceae* or *Azospira*. Inversely, several  
36   bacterial groups were identified as sensitive to chlorination such as Chloroflexi and  
37   Planctomycetes. Nevertheless, one month after stopping the treatments the bacterial diversity  
38   re-increased and the chlorine-sensitive bacteria such as Chloroflexi phylum and the  
39   Saprospiraceae, Spirochaetaceae, Christensenellaceae and Hydrogenophilaceae families re-  
40   emerged with the growth of biofouling, highlighting the resilience of the bacteria from drippers.  
41   Based on PCoA analyses, the structure of the communities still clustered separately from never-  
42   chlorinated drippers, showing that the effect of chlorination was still present one month after  
43   stopping the treatment.

44   Keywords: Drip irrigation; biofilm; cleaning methods, Optical Coherence Tomography;  
45   High-throughput DNA sequencing, water reuse

46

## 47 **1. Introduction**

48 Due to the scarcity of water resources, the use of reclaimed wastewater for crop  
49 irrigation is increasing significantly worldwide, particularly in arid and semi-arid countries  
50 (Ait-mouheb et al., 2020). Drip irrigation combined with the use of reclaimed wastewater has  
51 several advantages, as it provides water to the plant (e.g. roots) in optimal quantities and  
52 frequencies for plant growth (Goyal, 2018; Wang et al., 2013). The drippers are generally  
53 designed by a narrow labyrinth channel (internal flow section around 1mm) which makes the  
54 development of a turbulent regime possible composed of a main high velocity flow and vortex  
55 zones in channel corners (Al-Muhammad et al., 2019, 2016; Wei et al., 2012). This milli-  
56 labyrinth flow path can be clogged by suspended particles, chemical precipitation and biofilms  
57 (Green et al., 2018; Y. Li et al., 2019; Oliveira et al., 2017, 2020; Rizk et al., 2019; Zhou et al.,  
58 2018). The biofilm growth increases physical and chemical clogging (Li et al., 2013; Tarchitzky  
59 et al., 2013) and is considered a key factor in the clogging of drip irrigation systems using  
60 reclaimed wastewater (Song et al., 2017; Wang et al., 2017). Therefore, the evaluation of  
61 methods to control and limit the development of biofilms in these systems is necessary (Lamm  
62 et al., 2007).

63 Existing methods to reduce clogging include precipitation, filtration, chlorination,  
64 acidification and pressure flushing (Duran-Ros et al., 2009; Katz et al., 2014; Puig-Bargués et  
65 al., 2010; Song et al., 2017). Although chlorination has been recognised as the least expensive  
66 method to treat clogging due to biological growth, the chlorination schemes recommended in  
67 the scientific literature differ according to the type of reagent used (liquid sodium hypochlorite  
68 (NaOCl), calcium hypochlorite ( $\text{Ca}(\text{OCl})_2$ ), gaseous chlorine ( $\text{Cl}_2$ )) the concentration and  
69 injection interval application (Goyal, 2018; Rav-Acha et al., 1995) Indeed, chlorination can be  
70 applied from 0.4 ppm (Batista et al., 2009) to more than 100 ppm (Chauhdary et al., 2015).  
71 Both the chlorine concentration and the injection frequency had an impact on the effectiveness  
72 of reducing clogging. However the application of high chlorine concentrations might intensify

73 the clogging by releasing clogging constituents that were previously stuck to the pipe wall (Rav-  
74 Acha et al., 1995) and can induce negative effects on crop growth, since a high chlorine  
75 concentration in the soil may lead to toxicity (Li and Li, 2009). Therefore, the use of low  
76 concentrations of free chlorine (1-2 ppm) at repeated frequencies (weekly, twice a week) has  
77 proven its effectiveness in limiting the fouling of the dripper (J. Li et al., 2010; Li et al., 2012;  
78 Song et al., 2017). Other studies have shown that the use of chlorine at too high frequencies  
79 (once or twice a week) can also promote the development of a biofilm resistant to chlorination  
80 (J. Li et al., 2010). However, the mechanisms and microorganisms involved in this process are  
81 little known. The in-depth analysis of the chlorination effects on the microbiome of drippers  
82 appears necessary to better understand the mechanisms of biofilm development and optimise  
83 the control of biofilm development (Zhou et al., 2017). Pressure flushing consists in washing  
84 water pipelines by increasing the hydraulic shear force within the pipe system. To be effective,  
85 flushing must be carried out often enough and at an appropriate rate to dislodge and transport  
86 accumulated sediment. The minimum flow velocity for flushing the drip irrigation system is  
87  $0.3-0.6 \text{ m s}^{-1}$ , thus removing clogging and particulate matter (Han et al., 2018; Lamm et al.,  
88 2007; Li et al., 2018). As for chlorination, the frequency of flushing (weekly to monthly)  
89 directly influences the efficiency of the method and the service life of the drip irrigation system  
90 (Lamm, 2013; Li et al., 2015, 2018; Puig-Bargués et al., 2010). Flushing the system as often as  
91 possible is recommended (Lamm et al., 2007), but this may promote the development of a  
92 flushing-resistant biofilm caused by specific bacteria (Li et al., 2015). Thus, despite studies  
93 aiming to optimise application parameters, the problem of clogging persists and the  
94 mechanisms involved are poorly understood.

95         The effectiveness of chlorination and pressure flushing methods on the biofouling of  
96 drip irrigation systems is often studied separately. However, several studies on drinking water  
97 systems have shown that combining the two methods was more effective in reducing the level

98 of colonisation rather than using them separately (Mathieu et al., 2014; Tsvetanova, 2020).  
99 Thus, studying the effect of these methods alone and in combination will lead to a better  
100 understanding of the mechanisms involved.

101 The objectives of the present study were to determine the effect of chlorination and  
102 pressure flushing, combined or used alone on (1) biofilm kinetic development and (2) on the  
103 microbial communities in biofilms formed in irrigation systems fed by reclaimed wastewater  
104 (RWW). To evaluate if the effect of the treatments were transient or permanent, biofilms were  
105 also analysed 1 month after stopping the cleaning procedures. A non-destructive optical time-  
106 monitoring observation system was developed to study biofilm growth in commercial drippers  
107 ( $1 \text{ l h}^{-1}$ ) by optical coherence tomography (OCT) (Lequette et al., 2020). The combined use of  
108 the OCT method and high-throughput sequencing made it possible to monitor the development  
109 of biofilm according to the cleaning methods used while evaluating the impact of these  
110 conditions on the bacterial composition. Although eukaryotes can influence the formation and  
111 development of biofilms (Parry, 2004; Parry et al., 2007), data on eukaryotes in drippers  
112 supplied by reclaimed wastewater are scarce (Dehghanisanij et al., 2005). Therefore, the impact  
113 of these cleaning methods on eukaryotes was also investigated.

## 114 **2. Materials and Methods**

### 115 *Experimental setup*

#### 116 *Experimental setup and irrigation procedure*

117 Non-pressure-compensating (NPC) drippers (model D2000, Rivulis Irrigation SAS,  
118 Lespinasse, France) with a flow rate of  $1 \text{ l.h}^{-1}$  (Table 1) were used. The NPC drippers were  
119 placed in a transparent tube (internal diameter 15 mm, TubClair, Vitry-le-François, France),  
120 allowing the analysis of the biofilm development along the channel over time without  
121 disturbances. More details are presented in Lequette et al. (2020). Four irrigation lines with nine

122 dripper systems per line were placed on the test bench: control (C-without cleaning event), a  
123 pressure flushing (PF), chlorination line (Cl) and pressure flushing/chlorination (PFC1) (see  
124 Cleaning procedures for details). Each of the four lines was connected to a separate tank (total  
125 volume 60l) and a pump (JetInox 82M, DAB, Saint-Quentin-Fallavier, France) (Figure 1.B). A  
126 disk filter (mesh size 0.13mm) was installed to reduce the physical clogging of emitters  
127 following the technical recommendations for this type of dripper. The inlet pressure was set at  
128 0.08 MPa (the dripper's nominal working pressure) with a pressure gauge. A gutter, connected  
129 to each respective tank, was installed below each lateral line to collect the water discharged  
130 from the drippers during the experiments. The lines were supplied twice a day, five days out of  
131 seven for 1 h, with an interval of 6h off. Discharge measurements were performed each week  
132 to evaluate emitter performance and the clogging. The relative average discharge of drippers  
133 (Li et al., 2015) was used to assess the drip irrigation performance and was calculated in  
134 Equation 1:

$$135 \quad Dra = \frac{\sum_i^n \frac{q_i^t}{q_i^0}}{n} \times 100 \quad (1)$$

136 where  $q_i^0$  indicated the nominal flow of drippers ( $l \cdot h^{-1}$ ),  $q_i^t$  the measured flow rate ( $l \cdot h^{-1}$ )  
137 and  $n$  was the total number of experimental emitters.

138 The drippers were considered clogged when the outflow presented a discharge of less than 75%  
139 (Yu et al., 2018b).

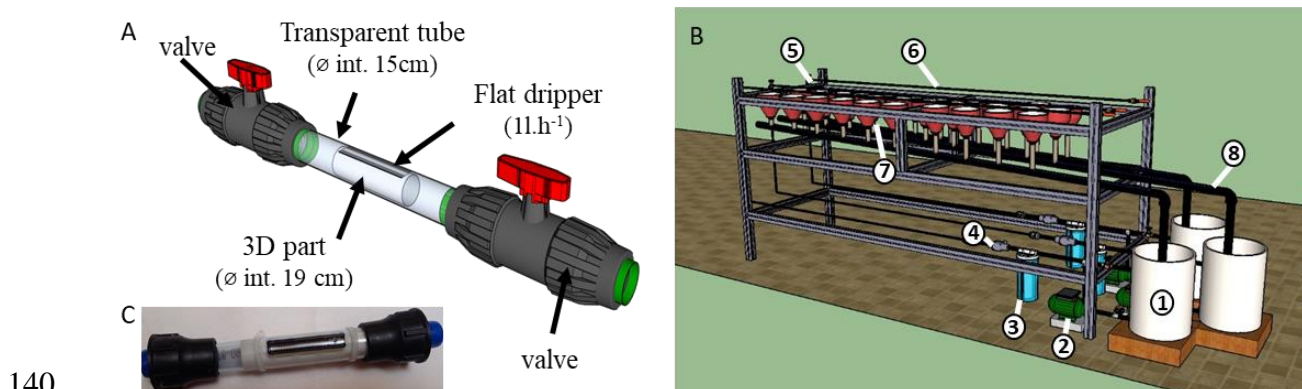

141 **Figure 1. Dripper system (A, C) and test bench (B).** The drippers were placed in a transparent  
 142 tube to enable optical measurements. The test bench was composed of 1. a tank (60l); 2. a water  
 143 pump; 3. a 0.13mm mesh screen filter; 4. a pressure reducer; 5. a pressure gauge; 6. the drip  
 144 line with an emitter system located at 10 cm intervals; 7. a collector; 8. a gutter.

145

146 Table 1 lists the dripper characteristics. The flow regimes were characterised by a Reynolds  
 147 number (Re). The Reynolds number (Re) was computed using the following Equation 2:

$$148 \quad Re = \frac{\rho v D_h}{\mu} \quad (2)$$

149 where  $\rho$  is water density ( $\text{kg}\cdot\text{m}^{-3}$ ),  $v$  the water velocity across the pipe ( $\text{m}\cdot\text{s}^{-1}$ ),  $D_h$  the hydraulic  
 150 diameter (m), and  $\mu$  the water dynamic viscosity (Pa s).

151 The hydraulic diameter),  $D_h$ , was calculated for a rectangular cross-section as (Equation 3):

$$152 \quad D_h = \frac{4A}{P} \quad (3)$$

153 where A: area (mm) and P for the perimeter (mm).

154

155 **Table 1 Dripper parameters**

| q ( $\text{l}\cdot\text{h}^{-1}$ ) | L<br>(mm) | W<br>(mm) | h<br>(mm) | $D_h$ | Total<br>labyrinth<br>volume<br>( $\text{mm}^3$ ) | Re<br>(inlet) | x   | CV (%) | Channel geometry                                                                      |
|------------------------------------|-----------|-----------|-----------|-------|---------------------------------------------------|---------------|-----|--------|---------------------------------------------------------------------------------------|
| 1                                  | 103.4     | 1.01      | 0.8       | 1.02  | 127                                               | 305           | 0.4 | 1.4    |  |

156 L: length of the flow path, W: width of the flow path, h: depth of the flow path, q: flow rate,  $D_h$ :  
 157 hydraulic diameter, x: pressure's exponent, CV: Coefficient of variation

158

159 *Physicochemical and microbiological quality of TWW*

160 The irrigation lines were supplied with reclaimed wastewater from the Murviel-Les-  
 161 Montpellier treatment plant in the South of France ( $43.605034^\circ$  N,  $3.757292^\circ$  E). The  
 162 wastewater treatment plant is designed around stabilisation ponds with three successive lagoons  
 163 ( $13\,680\text{ m}^3$ ,  $4784\text{ m}^3$  and  $2700\text{ m}^3$ ) and a nominal capacity of 1,500 Inhabitant Equivalent.

164 RWW was placed in a 60l tank and changed twice a week to maintain the quality close to that  
165 of the wastewater from the treatment plant. Each week (n=16), several physical-chemical and  
166 microbiological analyses were performed to evaluate the RWW quality. Chemical oxygen  
167 demand (COD), ammonia, nitrate, and phosphorus concentrations ( $\text{mg l}^{-1}$ ) were measured with  
168 a spectrophotometer (DR1900, Hach Company, Loveland, CO, USA) using LCK Hach  
169 reagents<sup>®</sup>. Conductivity and pH were measured with probes (TetraCon<sup>®</sup> 925 and pH-Electrode  
170 Sentix<sup>®</sup> 940, WTW, Wilhelm, Germany). Faecal coliforms, *E. coli*, and *Enterococci* were  
171 quantified using the IDEXX method (Colilert18 and Enterolert, IDEXX Laboratories,  
172 Westbrook, ME) according to the supplier's recommendations. The main effluent properties are  
173 listed in Table 2.

174 **Table 2 Physico-chemical and microbiological characteristics of the RWW**

| <b>Characteristics</b>  | <b>Units</b>          | <b>Mean<br/>(n=9)</b> | <b>SD</b> |
|-------------------------|-----------------------|-----------------------|-----------|
| COD (LCK 614)           | $\text{mg l}^{-1}$    | 159.7                 | 25.1      |
| Total suspended solids  | $\text{mg l}^{-1}$    | 65.9                  | 13.8      |
| Ammonia (LCK 303)       | $\text{mg l}^{-1}$    | 28.1                  | 11.8      |
| Nitrate (LCK 339)       | $\text{mg l}^{-1}$    | 3.1                   | 1.1       |
| Phosphorus (LCK 350)    | $\text{mg l}^{-1}$    | 7.0                   | 0.8       |
| Conductivity            | $\mu\text{S cm}^{-1}$ | 1319.3                | 82.1      |
| Dissolved oxygen        | $\text{mg l}^{-1}$    | 8.8                   | 0.4       |
| pH                      |                       | 7.9                   | 0.1       |
| Total coliforms         | MPN/100<br>mL         | 3.10E+05              | 1.60E+05  |
| <i>Escherichia coli</i> | MPN/100<br>mL         | 1.08E+05              | 0.8E+05   |
| <i>Enterococci</i>      | MPN/100<br>mL         | 2.73E+04              | 1.72E+04  |

### 175 ***Cleaning procedures***

176 Cleaning event tests were divided in two periods: a cleaning period (71 days) followed  
177 by a period without cleaning events (33 days) in order to study the interruption of these  
178 treatments on the biofilm's regrowth. During the cleaning period, chlorination and pressure  
179 flushing were applied once a week during 1h.



180 For the disinfection method, liquid sodium hypochlorite (NaOCl) with a residual chlorine  
181 concentration >9% was used for chlorination. NaOCl was added directly to the tank in order to  
182 reach 1.5 ppm of free chlorine at the end of the drip irrigation line. After the system had been  
183 running for 1h, the residual free chlorine concentration was tested every 10 min at the end of  
184 the drip irrigation lines using LCK 310 Hach reagents<sup>®</sup>. Depending on the measurements,  
185 NaOCl was added in the tanks to maintain the 1.5 ppm of free chlorine in the system.

186 The maximum working pressure used for the drippers (1 l.h<sup>-1</sup>) was 0.25MPa according to the  
187 manufacturer's recommendations. However, the use of the transparent tubes around the dripper  
188 systems did not allow this pressure to be reached without damaging the system. Therefore, for  
189 lateral flushing procedures, the valves at the end of the drip-line were closed and the pressure  
190 was increased to 0.18MPa. The pressure was controlled using a manometer placed at the inlet  
191 of the dripline. After each cleaning event, RWW from the test bench was removed and replaced  
192 by new RWW.

### 193 *Image acquisition and processing*

#### 194 *Image acquisition*

195 Optical coherence tomography (OCT) was used to study the kinetics of biofilm in the  
196 drippers and along the milli-channel throughout the experimental period (Table 3) after 3 weeks  
197 of running. Measurements were made in situ and non-invasively through the transparent tube.  
198 For the measurements, the valves of the dripper systems were closed to keep the drippers in the  
199 water. The dripper system was then disconnected from the irrigation line. Measurements were  
200 taken at least once every two weeks. Due to the number of drippers, the monitoring of the 36  
201 drippers (9 per lines) by OCT was carried out over one week. After the OCT measurement,  
202 each dripper was returned to its original location on the test bench. The three-dimensional OCT  
203 measurements were acquired using a Thorlabs GANYMEDE II OCT (LSM03 lens, axial

204 resolution= 2.1  $\mu\text{m}$ , lateral resolution= 8 $\mu\text{m}$ ; Thorlabs GmbH, Lübeck, Germany). The size of  
 205 the axial voxel in water ( $n = 1.333$ ) of the GANYMEDE II is 2.1  $\mu\text{m}$ . OCTs have a center  
 206 wavelength of 930 nm.

207 **Table 3 Analysis and sampling schedule.** \*: After one month, one dripper from the control  
 208 line was totally clogged. After 29 days this dripper was sampled along with 3 randomly chosen  
 209 ones. This explains why the number of drippers monitored and sampled at 104 days is lower  
 210 than in the other conditions.

| Date                                  | Week                               |      |      |             | Sampling dates                                           |    |             |
|---------------------------------------|------------------------------------|------|------|-------------|----------------------------------------------------------|----|-------------|
|                                       | Cleaning                           |      |      | No-cleaning | Cleaning                                                 |    | No-cleaning |
|                                       | 3                                  | 6    | 10   | 15          | 29                                                       | 71 | 104         |
| Number of drippers per condition (n=) | 9                                  | 5*-6 | 5*-6 | 2*-3        | 4*-3                                                     | 3  | 2*-3        |
| Analyses                              | OCT (inlet, outlet & return areas) |      |      |             | OCT (inlet, outlet & return areas) & 16S rRNA sequencing |    |             |

### 211 *Image analysis*

212 OCT acquisition was performed in order to follow the biofouling development in time  
 213 (volume and thickness) depending on the treatment used. First, 3-D OCT datasets were  
 214 processed in Fiji (running on ImageJ version 1.50b, Schindelin et al. (2009)) and converted into  
 215 8-bit grayscale. The datasets were resliced from top to bottom into image stacks and regions of  
 216 interest (inlet, outlet and return areas) were selected (Figure S1 in Supplemental material). The  
 217 remaining parts were allocated to the background (black). Secondly, an in-house code was used  
 218 to detect the pixels associated with the plastic tube and removed using MATLAB R2018r  
 219 (MathWorks®, version 2018b). A threshold (adapted to each dataset) was applied to binarize  
 220 the dataset and the region above the interface was quantified as biofilm. For each position (x,  
 221 y), the pixels associated with the biofilm (up to the threshold) were summed (on z) to obtain

222 the thickness of the biofilm. The biofilm volume ( $\text{mm}^3$ ) was calculated for each area according  
223 to Equation 4:

$$224 \quad \text{Volume of biofilm} = \frac{V_{\text{biofilm}}}{V_{\text{areas}}} \quad (4)$$

225 where  $V_{\text{biofilm}}$  is the biofilm volume and  $V_{\text{areas}}$  is the volume of the area of interest (inlet, outlet,  
226 return).

227 After the first visualisation of the data, an additional data-driven approach was realised  
228 conducting to apply the quantification of the biofilm along the labyrinth divided into two zones  
229 (around the edges / around the middle). Zones were created using a 'median split' procedure.  
230 The width of the tube was determined for each x-step and divided by four in order to separate  
231 the tube into two equivalent areas: i) the middle zone corresponds to the two central quarters,  
232 ii) the edge zone corresponds to the two side quarters summed.

### 233 *Analysis of microbial communities*

#### 234 *Biofilm and RWW samplings*

235 After the first visualisation of the data, an additional data-driven approach was realised  
236 conducting to apply the quantification of the biofilm along the labyrinth divided into two zones  
237 (around the edges / around the middle). Zones were created using a 'median split' procedure.  
238 The width of the tube was determined for each x-step and divided by four in order to separate  
239 the tube into two equivalent areas: i) the middle zone corresponds to the two central quarters,  
240 ii) the edge zone corresponds to the two side quarters summed.

#### 241 *DNA extraction*

242 DNA was extracted using the PowerWater® DNA Isolation Kit (Qiagen, Hilden,  
243 Germany). The samples (drippers or filters) were placed in 5 ml tubes containing beads. The  
244 manufacturer's instructions were then followed. The DNA concentration was measured and the

245 purity checked by spectrophotometry (Infinite NanoQuant M200, Tecan, Austria). The  
246 extracted DNA was stored at -20°C.

#### 247 *Bacterial quantification by qPCR*

248 Total bacterial quantification was performed by qPCR on biofilms from drippers  
249 targeting the V9 region from 16S rDNA. The amplification reactions were performed in  
250 triplicate, and at two dilutions to check for the absence of inhibition of the PCR reaction.  
251 Reaction mixes (12µl) contained 2.5µl of water, 6.5µl of Super Mix qPCR (Invitrogen), 100nM  
252 forward primer BAC338 (5'-ACTCCTACGGGAGGCAG-3'), 250nM of reverse primer  
253 BAC805 (5'-GACTACCAGGGTATCTAAT CC-3') and 50nM of probe BAC516 (Yakima  
254 Yellow- TGCCA GCAGC CGCGG TAATA C –TAMRA) (Yu et al., 2005). The cycling  
255 parameters were 2 min at 95°C for pre-incubation of the DNA template, followed by 40 cycles  
256 at 95°C for 15 sec for denaturation and 60°C for 60 sec for annealing and amplification.

#### 257 *Illumina sequencing*

258 The PCR amplified the V4-V5 region of 16S rRNA genes with 30 cycles (annealing  
259 temperature 65°C) using the primers 515U (5'-GTGYCAGCMGCCGCGGTA-3') and 928U  
260 (5'-CCCCGYCAATTCMTTTRAGT-3') (Wang and Qian, 2009). A PCR amplified the 18S  
261 rRNA genes (30 cycles, annealing temperature 56°C) was also performed using the primers 5'-  
262 GCGGTAATTCCAGCTCCAA-3' and 5'-TTGGCAAATGCTTTCGC-3' (Hadziavdic et al.,  
263 2014) on dripper biofilms at the end of the cleaning period. Adapters were added for  
264 multiplexing samples during the second amplification step of the sequencing. The resulting  
265 products were purified and loaded onto the Illumina MiSeq cartridge for sequencing of paired  
266 300 bp reads according to the manufacturer's instructions (v3 chemistry). Sequencing and  
267 library preparation was performed at the Genotoul Lifescience Network Genome and  
268 Transcriptome Core Facility in Toulouse, France ([get.genotoul.fr](http://get.genotoul.fr)). Mothur (version 1.39.5)

269 (Schloss et al., 2009) was used to associate forward and reverse sequences and clustering at  
270 four different nucleotides over the length of the amplicon. Uchime (Edgar et al., 2011) was used  
271 to identify and remove chimera. Sequences that appeared less than three times in the entire data  
272 set were removed. In all, 16S rRNA sequences were aligned using SILVA SSURef NR99  
273 version 128 (Schloss et al., 2009). Finally, sequences with 97% similarity were sorted into  
274 operational taxonomic units (OTUs) (Nguyen et al., 2016). The chloroplast sequences from 16S  
275 rRNA sequences were removed from the raw data and represented respectively 2.8% and 16.6%  
276 of the sequences in biofilms and in RWW samples. Finally, BLAST  
277 (<http://www.ncbi.nlm.nih.gov/BLAST/>) was used to locate publicly available sequences  
278 closely related to the sequences obtained from the samples. A total of 2,281,644 reads were  
279 grouped in 3210 OTUs at the 97% similarity level. The rarefaction curves indicated that the  
280 sequencing depths of all samples were adequate (Figure S2 in Supplementary material).

### 281 *Statistical analyses*

282 Non-parametric statistical tests (Kruskal and Wilcoxon tests) were performed to  
283 compare the biofilm volume and the biofilm distribution along the labyrinth depending on the  
284 treatment used. The Shannon diversity index, the reciprocal Simpson index, and the  
285 nonparametric richness estimators Chao1 was also calculated for each RWW and biofilm  
286 sample. Chao1 richness estimates were based on singletons and doubletons as described by  
287 Chao1 (Chao, 1984). Kruskal-Wallis tests were performed to compare indices of diversity and  
288 richness according to the origin of the sample, and biofouling rate between the drippers. For the  
289 comparison of bacterial community structures, a dissimilarity matrix (Bray-Curtis) was  
290 performed and visualised using principal coordinate analysis (PCoA). A one-way analysis of  
291 similarities (ANOSIM) was used to identify significant differences in community assemblage  
292 structure between samples based on the origin of the sample (Clarke, 1993). The genera that  
293 contribute most to the divergence between two habitats were identified using Similarity

294 Percentage (SIMPER) analysis (Clarke, 1993). The sequencing data analysis was processed  
295 under R v3.4 ([www.r-project.org](http://www.r-project.org)) through R-Studio (<http://www.rstudio.com/>) with the  
296 phyloseq package (McMurdie and Holmes, 2012).

### 297 **3. Results**

298 The development kinetics of the biofilms under chlorination and pressure flushing  
299 treatments, combined or used alone, were followed for 71 days using OCT measurements and  
300 compared to each other and to non-treated controls. The drippers were collected after 29 and  
301 71 days in order to characterise the effect of these treatments on the bacterial composition of  
302 the biofilms. After 71 days, the treatments were stopped and drippers were analysed at day 104  
303 to evaluate if the effect of the treatments were permanent or transitory.

#### 304 ***Biofouling kinetic analysis***

##### 305 *Dynamic changes for outflow ratio variation of drippers*

306 Changes of discharge ratio (Dra) along the lateral are shown in Figure 2. Dra decreased mainly  
307 for control (C) and pressure flushing (PF) lines over time, reaching about 80% after 2 months.  
308 The Dra of the chlorinated lines (Cl and PFCl) was close to 100% after 2 months of treatment,  
309 meaning that chlorination allowed a better control of the flow rates than purge only. For the  
310 same treatment, the Dra sometimes increased between two measurements, which indicates that  
311 the clogging of the drippers can be temporary and that detachment can occur. In the control  
312 line, the majority of the drippers (7/9 after 71 days) presented a discharge of less than 75% and  
313 one dripper was totally clogged after one month (no outflow). In the pressure line, 4/9 drippers  
314 were considered as clogged after 71 days while none were clogged for chlorinated lines  
315 (chlorination alone or combined with pressure flushing). After 1 month without any cleaning  
316 steps, the Dra from the C and PF lines increased but were still lower than the Dra from the  
317 chlorinated lines.

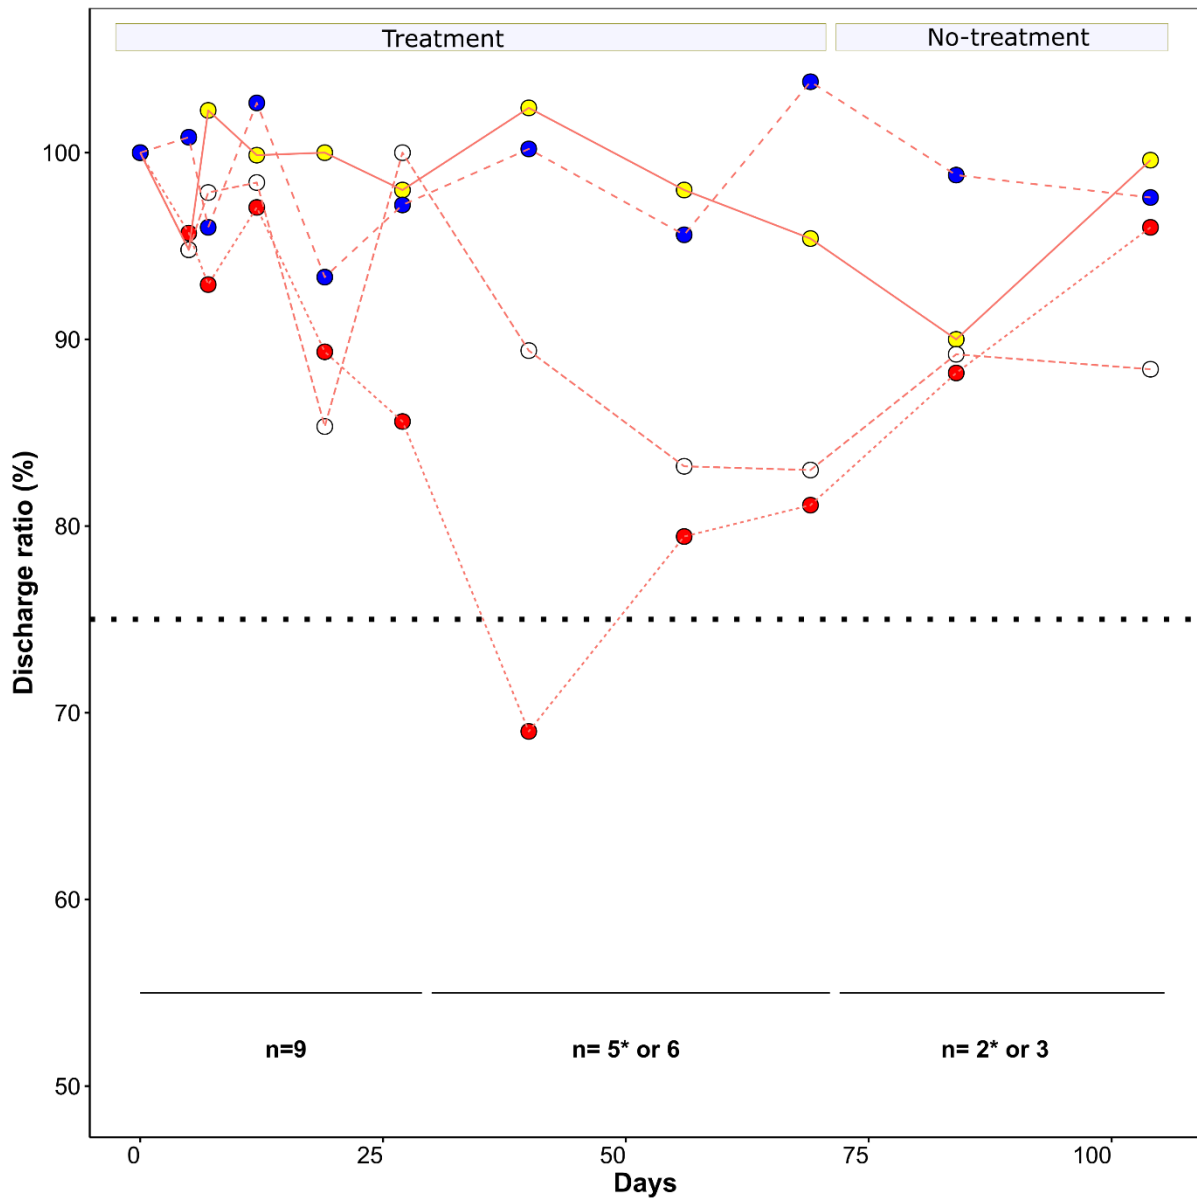

318

319 **Figure 2 Discharge ratio variation according to the cleaning procedure used.** Control (●),  
320 Pressure Flushing (○), Chlorination (●) and Pressure Flushing combined with Chlorination (●).  
321 The drippers were considered as clogged when the discharge was less than 75% (dotted line).  
322 *n* corresponds to the number of drippers for each line (\* : data control line).

323 *Chlorination combined with pressure flushing decreased biofouling*

324 The volume and thickness of the biofilm were determined using OCT in the areas of the canal  
325 most sensitive to fouling: the inlet, outlet and return zones.

326 The biofilm volume increased during the cleaning phase (p-value < 0.05, Figure 3). Although  
327 the average volume was lower in the PFCI condition after 10 weeks, there were no statistically  
328 significant differences between conditions indicating that the treatments had no significant

329 effect on the overall biofouling level. This may be due to important variability between the  
330 triplicates. After one month without cleaning steps (at week 15), the mean biofouling volume  
331 increased in PF, CI and PFCI conditions and volume was higher in the PF condition than in  
332 PFCI (p-value = 0.06) (Figure 3).

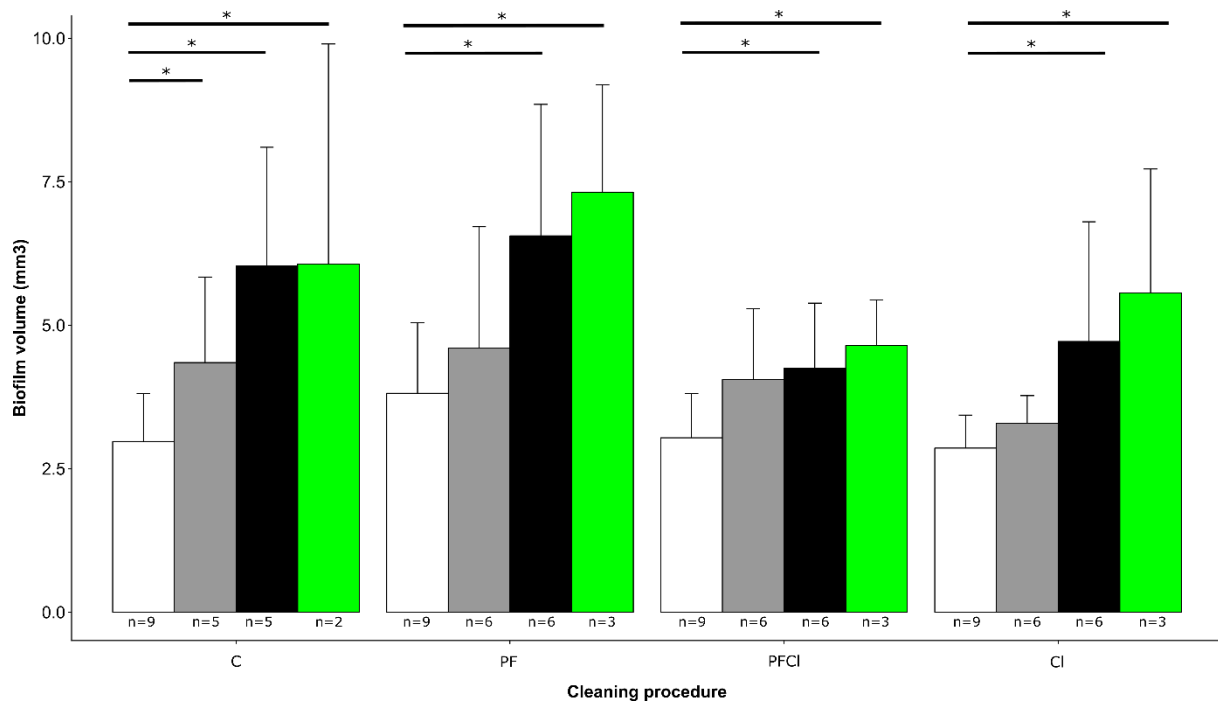

333

334 **Figure 3 Evolution over time of the biofilm volume according to the cleaning method used**  
335 (at weeks 3, 6, 10 (cleaning phase) and 15 (no-cleaning phase); white, grey, dark grey and green  
336 respectively). C= control, PF= Pressure flushing, PFCI= Pressure flushing combined with  
337 chlorination, CI= Chlorination. *n* refers to the number of drippers. The biofouling volume was  
338 quantified as the sum of the fouling volumes developed for the inlet, return and outlet areas. \*  
339 shows significant differences (p-value < 0.05) on the conover test.

340

341 The study of the volume of clogging in the areas of interest shown that the biofouling tended to  
342 be higher in the inlet areas whatever the treatment was (Figure S3). Moreover, the outflow of  
343 the dripper was negatively correlated to the increase of the inlet biofouling volume after 10  
344 weeks (Pearson's test,  $r=-0.44$ ,  $p<0.05$ ), which may explain the decrease in Dra observed for  
345 lines C and PF (Figure 2).

346 Although the overall volume of biofilm in the drippers and sensitive areas was statistically  
347 similar over time between the conditions, the thickness of the biofilm was significantly



348 influenced by the treatment used. Figure 3 shows the increase in biofouling thickness in the  
 349 inlet areas during the cleaning period at weeks 3, 10 and 15. The inlet of the channel was the  
 350 most sensitive area, in particular in the first baffle (p-value <0.05) where the average thickness  
 351 increased by more than 0.5 mm (depth of the channel: 0.8 mm). The biofouling of the C drippers  
 352 increased along the labyrinth but did not exceed 0.3-0.4 mm (Figure 4). OCT images showed  
 353 that biofouling thickness decreased mainly in the middle of the channel when chlorination was  
 354 applied (CI and PFCI lines) at the inlet (Figure 4), outlet (Figure S4) and close to the return area  
 355 (Figure S5) compared to C and PF lines.  
 356

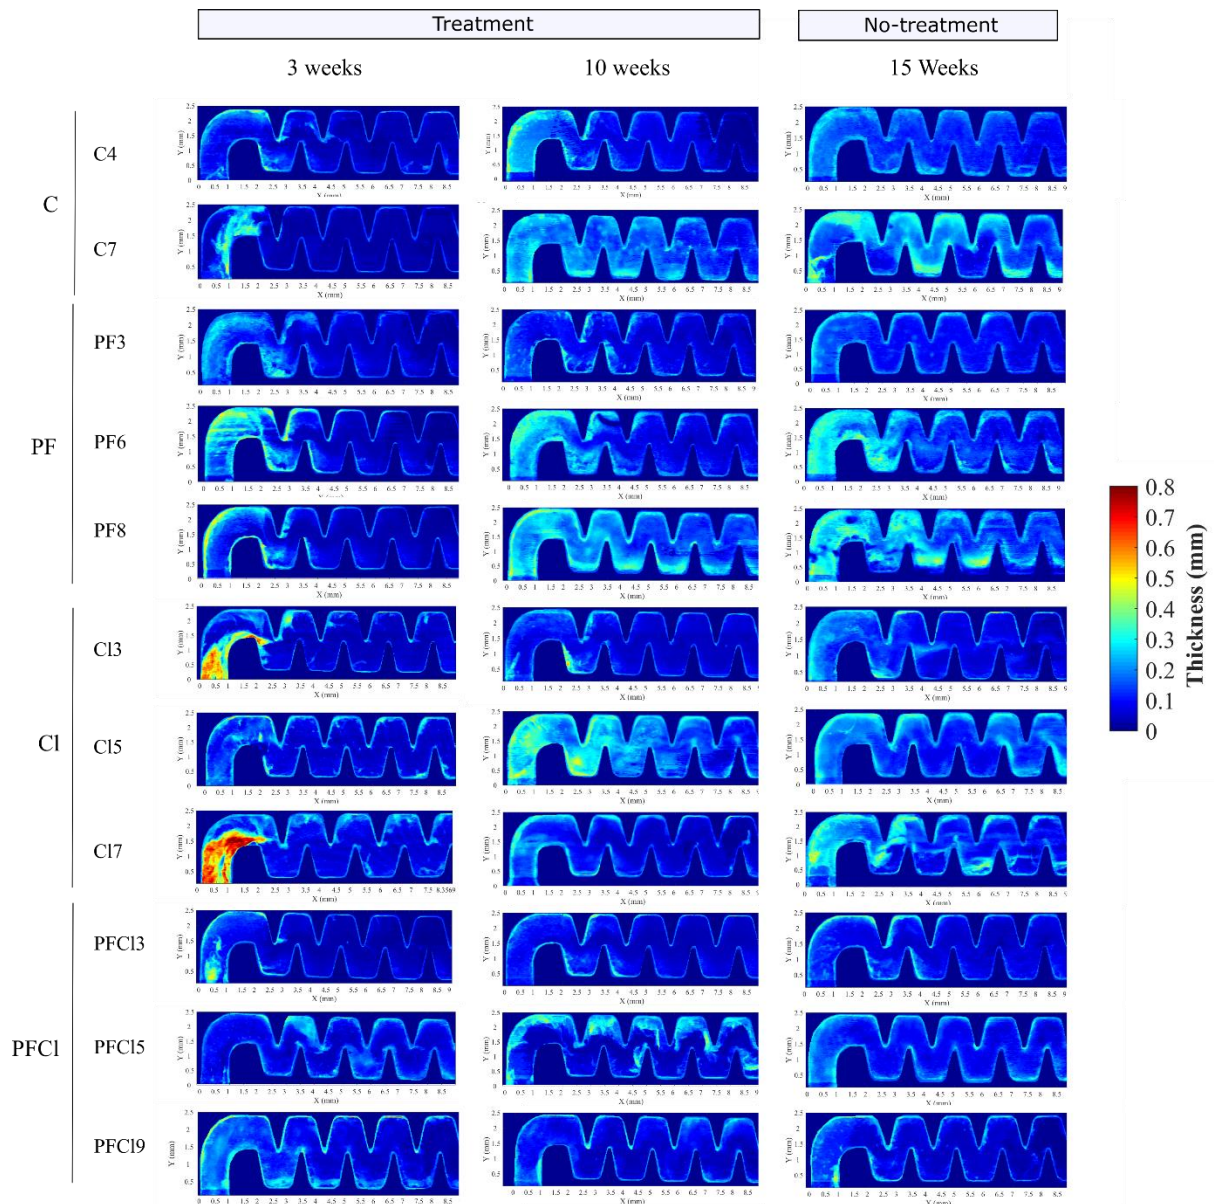

357

358 **Figure 4 Biofilm thickness at the inlet of drippers under C (Control), PF (Pressure**  
359 **flushing), CI (Chlorination) and PFCI (Pressure flushing/Chlorination) conditions**  
360 **measured after 3, 10 and 15 weeks.** The drippers presented are those also analysed by high-  
361 throughput sequencing at 104 days.

362

363 To further explore the differences in locations of the biofilm between conditions, the  
364 inlet area was divided along the labyrinth into 2 parts: the middle and the edges. The number  
365 of pixels associated with biofouling was then determined in each of these areas. Figure 5 shows  
366 the mean pixels quantity of biofouling along the inlet channel in the middle and along the edges  
367 at the end of the cleaning step (10 weeks). When chlorination was combined with pressure  
368 flushing (PFCI), the number of pixels associated with biofouling along the inlet channel was  
369 statistically lower in the middle and close to the edges compared to the C, PF and CI lines.  
370 Biofouling tended to be lower in the middle part than in the edges part. After 1 month without  
371 cleaning events, the number of pixels associated with biofouling along the inlet channel was  
372 similar in the middle and on the edges between all tested conditions (Figure S6). This means  
373 that the use of chlorination combined with increasing pressure, affected the location of the  
374 biofilm (edges or middle zone) rather than the overall amount of biofouling in the inlet zone.  
375 Moreover, this means that the combination of chlorination and pressure flushing was more  
376 efficient than the chlorination alone to limit biofilm growth.  
377 For some chlorinated drippers (CI3, CI7), the thickness between the 19<sup>th</sup> and 71<sup>st</sup> days had  
378 decreased around the first inlet baffle, suggesting that some detachment of biofilm occurred  
379 (Figure 4).

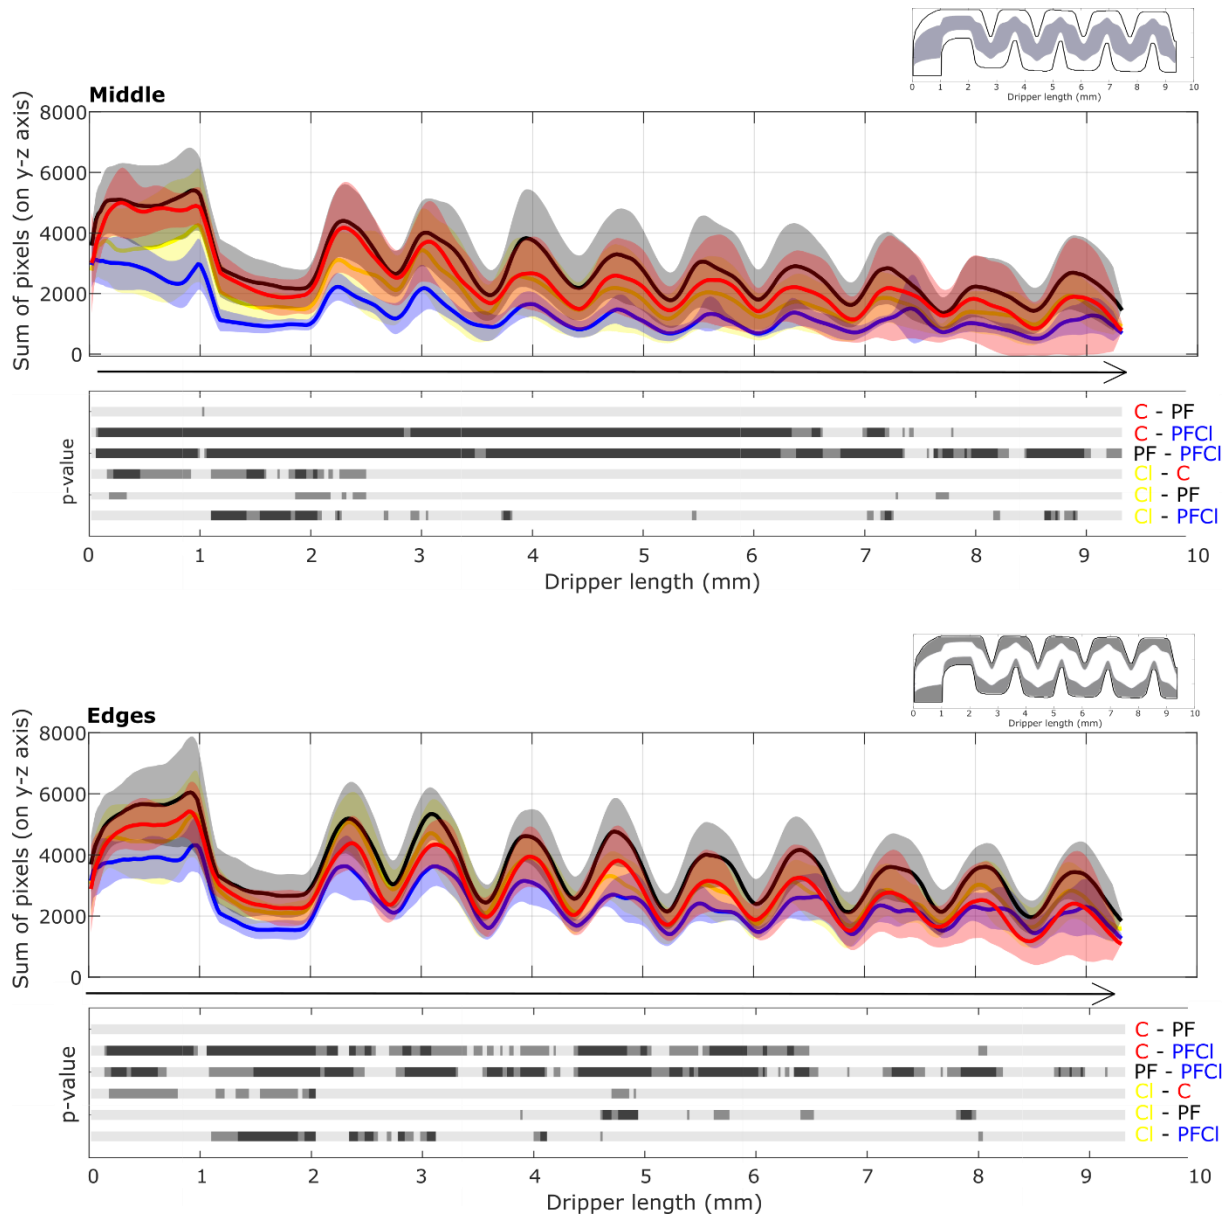

380

381 **Figure 5 Means and standard deviation of pixels associated with biofouling in the middle**  
382 **and on the edges of the inlet dripper channel after 10 weeks of treatment.** For each position  
383 of x, pixels in y-z are summed. Grey areas on inlet schemes at right-top indicate the zone of  
384 interest. Control (C-●), Pressure flushing (PF-●), Chlorination (Cl-●) and Pressure flushing  
385 combined with Chlorination (PFCI-●); the arrow indicates the direction of the flow along the  
386 channel; n=6 per condition. P-value graphs show the results of the Wilcoxon tests with ■: non-  
387 significant, ■: p<0.1, ■: p<0.05.

388

### 389 *Biofouling level and bacterial quantification*

390 The quantity of bacterial cells in the drippers during the cleaning period was between  
391  $10^9$  and  $10^{10}$  copies of 16S rDNA at 29 days and between  $10^{10}$  and  $10^{11}$  copies at 71 days

392 (Figure 6A) (background level of  $10^3$  copies of 16S rDNA at t<sub>0</sub>). The number of copies of 16S  
393 rDNA increased significantly between days 29 and 71 for the C, PF and PFCl conditions (p-  
394 value<0.05) but not for the Cl condition (p-value>0.05). At 29 days, the number of copies of  
395 16S rDNA in the control (C) and Cl conditions were higher than in the PFCl condition (p-value  
396 <0.05). At 71 days, the number of copies of 16S rDNA remained higher in the C condition than  
397 in the PFCl condition, which means that the combination of chlorination and pressure flushing  
398 reduces the number of bacteria more efficiently than pressure flushing (PF) or chlorination  
399 alone (Cl). Regardless of the protocol studied, the fouling level given by the volume of biofilm  
400 was positively correlated to the number of bacteria during the cleaning period (Pearson test,  
401  $r=0.66$ ) at 71 days, meaning that the number of bacteria in the dripper increased with the  
402 biofouling (Figure 6B).

403 After one month without cleaning events, the number of copies of 16S rDNA was similar with  
404 that of the end of the cleaning period for each condition and the concentrations remained higher  
405 in the C and PF conditions compared with the PFCl condition.

406

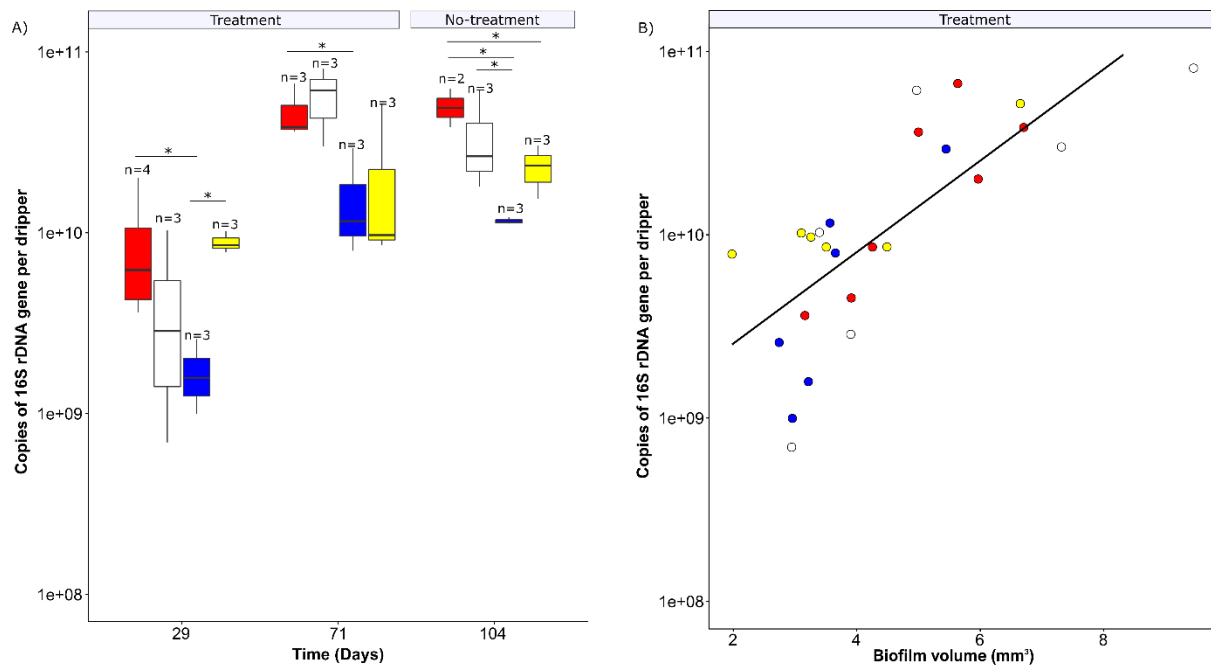

407

408 **Figure 6 Evolution of the bacterial quantity by dripper according to the cleaning method**  
409 **used (left) and the biofilm volume (right).** Control (●), Pressure flushing (○), Chlorination  
410 (●) and Pressure flushing combined with Chlorination (●). The biofouling volume was  
411 quantified as the sum of the fouling at the inlet, return and outlet areas. \* indicates significant  
412 differences (conover-test, p-value < 0.05).

### 413 *Bacterial Community Structure Analysis*

414 The bacterial communities in dripper biofilms collected after 29 and 71 days were compared  
415 using 16S rDNA Illumina sequencing to evaluate the treatment effects. They were also  
416 compared with the communities present in reclaimed wastewater used to supply the dripper  
417 systems and renewed every week. After 71 days, treatments were stopped and biofilms were  
418 sampled again at 104 days to investigate the resilience of the communities, i.e. to test if the  
419 biofilms would then become closer to the control condition.

### 420 *Structure of bacterial communities*

421 During the cleaning period, the richness increased significantly between 29 days and 71 days  
422 for all conditions (Table 4, conover test, p-value < 0.05) along with the biofouling level. The  
423 diversity indices remained similar (conover test, p-value > 0.05) except for the Cl condition  
424 where the diversity indices increased after 71 days.

425 The richness and diversity indices from the C and PF conditions were higher than in both  
 426 chlorinated conditions (Cl and PFCI) at 29 days and 71 days (Table 4) indicating that the  
 427 structure of the bacterial community was impacted by the treatment used. After the cleaning  
 428 period (104 days), the richness and diversity indices were similar between the drippers of the  
 429 different lines. However, the richness had increased in the Cl and PFCI lines while it remained  
 430 stable in the C and PF lines. The Shannon index increased in the PF, Cl and PFCI conditions  
 431 and was statistically higher than in the control (C) condition. In addition, the 1/Simpson's index  
 432 for the C line decreased from 71 days to 104 days.

433

434 **Table 4 Richness and diversity indices according to the cleaning method**

| Period              | Day       | Methods    | Richness indices       |                        | Diversity indices       |                         |
|---------------------|-----------|------------|------------------------|------------------------|-------------------------|-------------------------|
|                     |           |            | Observed               | Chao1                  | Shannon                 | 1/Simpson               |
| Treatment period    | 29        | C (n=4)    | 478 ± 59 <sup>a</sup>  | 642 ± 53 <sup>a</sup>  | 4.6 ± 0.1 <sup>a</sup>  | 47.8 ± 1.9 <sup>a</sup> |
|                     |           | PF (n=3)   | 469 ± 17 <sup>a</sup>  | 677 ± 85 <sup>a</sup>  | 4.6 ± 0.1 <sup>a</sup>  | 50.9 ± 4 <sup>a</sup>   |
|                     |           | PFCI (n=3) | 443 ± 34 <sup>a</sup>  | 549 ± 30 <sup>bc</sup> | 4.1 ± 0.2 <sup>bc</sup> | 18 ± 6.1 <sup>b</sup>   |
|                     |           | Cl (n=3)   | 309 ± 49 <sup>a</sup>  | 441 ± 53 <sup>b</sup>  | 3.4 ± 0.1 <sup>c</sup>  | 11.4 ± 1.2 <sup>b</sup> |
|                     | 71        | C (n=3)    | 597 ± 46 <sup>a</sup>  | 851 ± 40 <sup>a</sup>  | 4.9 ± 0.1 <sup>a</sup>  | 59.9 ± 7.2 <sup>a</sup> |
|                     |           | PF (n=3)   | 572 ± 41 <sup>a</sup>  | 786 ± 8 <sup>a</sup>   | 4.7 ± 0.1 <sup>a</sup>  | 45.8 ± 8.3 <sup>a</sup> |
|                     |           | PFCI (n=3) | 520 ± 37 <sup>ab</sup> | 698 ± 49 <sup>bc</sup> | 4.2 ± 0.1 <sup>b</sup>  | 18.9 ± 4.6 <sup>b</sup> |
|                     |           | Cl (n=3)   | 408 ± 85 <sup>b</sup>  | 578 ± 147 <sup>b</sup> | 4.2 ± 0.1 <sup>b</sup>  | 26.0 ± 2.5 <sup>b</sup> |
| No treatment period | 104       | C (n=2)    | 512 ± 83 <sup>a</sup>  | 751 ± 133 <sup>a</sup> | 4.4 ± 0.1 <sup>a</sup>  | 26.9 ± 4.5 <sup>a</sup> |
|                     |           | PF (n=3)   | 665 ± 103 <sup>a</sup> | 924 ± 159 <sup>a</sup> | 5.1 ± 0.1 <sup>b</sup>  | 63.3 ± 4.3 <sup>b</sup> |
|                     |           | PFCI (n=3) | 741 ± 52 <sup>a</sup>  | 946 ± 73 <sup>a</sup>  | 5.0 ± 0.1 <sup>bc</sup> | 48.7 ± 10 <sup>ab</sup> |
|                     |           | Cl (n=3)   | 678 ± 49 <sup>a</sup>  | 938 ± 91 <sup>a</sup>  | 4.8 ± 0.1 <sup>c</sup>  | 32.9 ± 6.3 <sup>a</sup> |
|                     | RWW (n=9) | 501 ± 67   | 671 ± 81               | 4.5 ± 0.3              | 36.3 ± 15.2             |                         |

435 Kruskal test and the conover ad hoc test were performed for each sampling time; the letters  
436 show the results of the conover test.  
437

438           PCoA confirmed that the bacterial community changed depending on the cleaning  
439 method and over time (Figure 7). Both the cleaning method and time were significant factors  
440 for explaining the differences in community structure ( $p < 0.05$ , Adonis). Pressure flushing,  
441 compared to the control condition, had no effect on the bacterial community structure. This was  
442 also true for pressure flushing combined with chlorination (when compared to chlorination  
443 alone). Thus, during the cleaning period, the bacterial population clustered depending on the  
444 use of chlorine (Adonis,  $p < 0.05$ ,  $R^2_{29 \text{ days}} = 0.58$  and  $R^2_{71 \text{ days}} = 0.68$ ). At 29 days, the bacterial  
445 populations from the C dripper biofilms were significantly different from the Cl and PFCI  
446 dripper biofilms (Adonis,  $p < 0.05$ ,  $R^2_{C-Cl} = 0.73$  and  $R^2_{C-PFCI} = 0.72$  respectively). After 1 month  
447 without cleaning events, the clustering depending on the use of chlorine was maintained  
448 (Adonis,  $p < 0.05$ ,  $R^2_{104 \text{ days}} = 0.46$ ) but there was no statistical difference between the chlorinated  
449 and non-chlorinated conditions (Adonis,  $p > 0.05$ ).

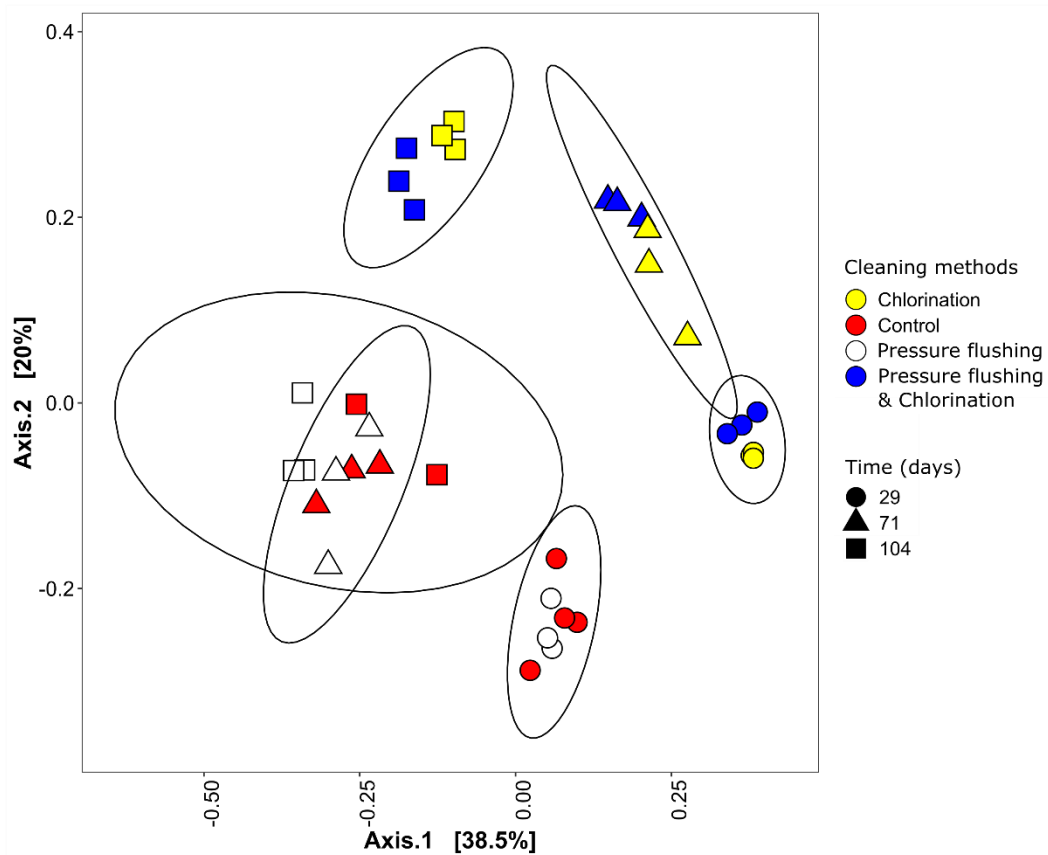

450

451 **Figure 7 Principal coordinate analysis (PCoA) of microbial communities from dripper**  
452 **biofilms at genus level.** The ellipsoids represent the 95% cut off similarity levels among  
453 samples.

454 *Composition of bacterial communities in RWW and dripper biofilms*

455 The biofilms and RWW microbiomes were both dominated by Proteobacteria (mainly  
456  $\beta$ - and  $\gamma$ -Proteobacteria), Bacteroidetes, Actinobacteria and Firmicutes (Figure 8A and 8B).  
457 However, some phyla were more abundant in RWW and others more specific to biofilms.  
458 Acidobacteria were mainly detected in samples of dripper biofilms whereas Actinobacteria and  
459 Verrucomicrobia phyla were more abundant in RWW samples. In addition, the relative  
460 abundance of the Spirochaetes phylum increased over time in the dripper biofilms but was less  
461 than 1% of the overall RWW bacterial community. This means that the dripper environment  
462 induced a bacterial selection. From 70 days onwards the Synergistetes phylum appeared in  
463 RWW, explaining its increase in two drippers sampled at 104 days. This means that the dynamic



464 of the bacterial composition of RWW has an effect on the bacterial community of dripper  
465 biofilms.

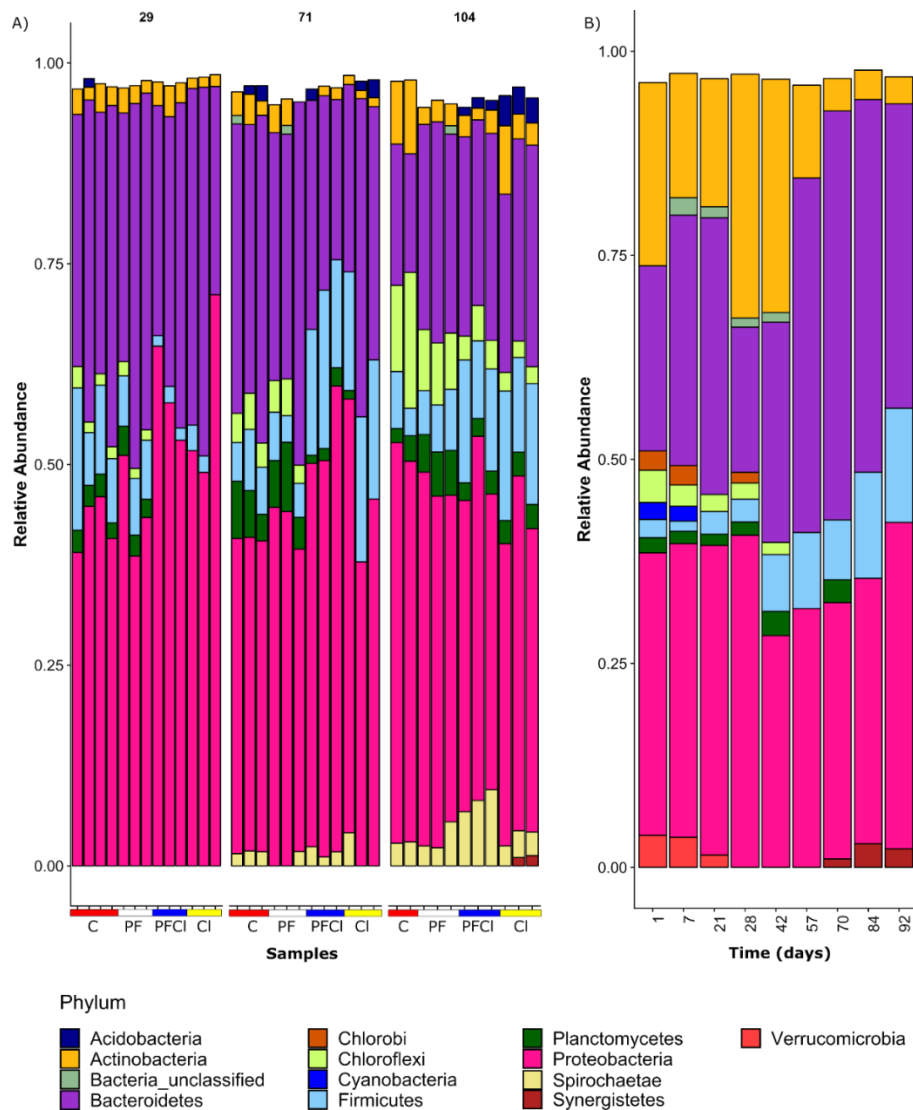

466

467 **Figure 8 Relative abundance of bacterial phyla (>1%) in dripper biofilms over time (A)**  
468 **and in reclaimed wastewater (B).**

469 Both the chlorination and pressure flushing methods modified the bacterial communities  
470 structure and composition. The relative abundance of Proteobacteria phylum was higher in  
471 chlorinated biofilms over time (Kruskal-test,  $p < 0.05$ ) while the relative abundance of  
472 Chloroflexi and Planctomycetes was lower (Kruskal-test,  $p < 0.05$ ). Indeed, Chloroflexi and  
473 Planctomycetes phyla were under-represented (<1% of the global community) in the biofilms  
474 of the chlorinated lines compared to the non-chlorinated biofilms during the cleaning period

475 (Figure 8A). These phyla were back in the 104 days samples once the treatment was stopped,  
476 but were still less dominant than in the non-chlorinated lines (mean relative abundances: 14%  
477 and 7% in C and PF respectively against 2% and 4% in Cl and PFCl respectively). This means  
478 that chlorination induced a bacterial selection and, although sensitive bacteria were able to grow  
479 again in the biofilm, the effect of chlorination on the communities remained 1 month after the  
480 treatments were stopped. Thus, the bacterial communities of the biofilms were driven by two  
481 factors: the dynamics of the bacterial composition of the RWW and the selection of some  
482 adapted taxa able to deal with chlorination.

483 As suggested with Figure 7, bacterial composition from the C and PF dripper biofilms  
484 was similar and were dominated by the same genera as members of Comamonadaceae family,  
485 *Dechloromonas*, env.OPS\_17 group at 29 days and *Terrimonas*, *Dechloromonas* and  
486 *Denitratisoma* at 71 days (Table S1). In addition, the SIMPER analysis showed that there were  
487 very few genera that induced differences between the structure of C and PF communities  
488 (Figure S8), which confirmed that the bacterial structure and composition were similar between  
489 C and PF dripper biofilms. There were also few differences between the Cl and PFCl conditions  
490 (Table S1), indicating that chlorination drove the bacterial composition, as suggested in Figure  
491 7.

492 The phyla whose abundance was most affected by the treatments were studied at family  
493 and genus levels in the dripper biofilms. Proteobacteria were mainly composed of  $\beta$ -  
494 Proteobacteria, followed by  $\gamma$ -Proteobacteria,  $\delta$ -Proteobacteria and  $\alpha$ -Proteobacteria. Relative  
495 abundances of  $\beta$ -Proteobacteria and  $\alpha$ -Proteobacteria were statistically higher in chlorinated  
496 biofilms (Cl and PFCl, Kruskal test,  $p < 0.05$ ) while  $\gamma$ -Proteobacteria were not impacted by the  
497 cleaning method used (Kruskal test,  $p > 0.05$ ). Inversely,  $\delta$ -Proteobacteria were statistically  
498 higher in non-chlorinated drippers (C and PF) with 2% against <1% in chlorinated drippers (Cl  
499 and PFCl). Among the  $\beta$ -Proteobacteria and  $\alpha$ -Proteobacteria, the Comamonadaceae member's

500 family, *Azospira*, Sphingomonadaceae, *Caulobacter* and *Hyphomicrobium* ( $\alpha$ -Proteobacteria)  
501 were more abundant in chlorinated biofilms (Kruskal test,  $p < 0.05$ ) whereas others were more  
502 abundant in the C and PF as *Denitratisoma* and *Aquabacterium* (Kruskal test,  $p < 0.05$ ) (Figure  
503 9, Table S1). SIMPER analysis indicated that *Azospira* and an unclassified genus from  
504 *Comamonadaceae* were the main genera responsible for the clustering of the bacterial  
505 community depending on the use of chlorination (Figure S8) during the cleaning period. The  
506 genus *Pseudoxanthomonas* ( $\gamma$ -Proteobacteria) were more abundant in Cl and PFCl (3-6%)  
507 conditions compared to C and PF conditions ( $< 1\%$ ) whereas the Run-SP154\_ge was more  
508 represented in non-chlorinated drippers (C and PF).

509 The relative abundance of Firmicutes (dominated by Clostridia class) were significantly  
510 higher in chlorinated biofilm compared to non-chlorinated biofilm (Kruskal-test,  $p < 0.05$ ) at 71  
511 days (4-6% in C-PF against 16-17% in Cl and PFCl respectively, Figure 8A). Moreover,  
512 *Fusibacter* genus (Clostridia class) drove the separation of the bacterial community structure  
513 according to the use of chlorine (Figure S8).

514 Chloroflexi (mainly composed of one Anaerolineaceae member's family, *Leptolinea*,  
515 Chloroflexi SBR2076 and SJA-15 group) and Planctomycetes phylum (mainly composed by  
516 OM190 group, *Planctomyces* and *Schlesneria* genera) were significantly lower in the  
517 chlorinated biofilms (Cl and PFCl) during the treatment period (Figure 8A).

#### 518 *Composition of eucaryotic communities in dripper biofilms*

519 At the end of the cleaning period, the 18S rRNA sequence analysis also showed an effect  
520 of the treatments on the structure and composition of the eukaryotic communities (Figure S9).  
521 The Ciliophora and Fungi classes were the most represented. Among the Ciliophora, the family  
522 Tokophryidae was mainly present in the biofilms of non-chlorinated drippers, while the families  
523 Vorticellidae and Peritrichia were mainly present in the biofilms of chlorinated drippers. The  
524 fungi, dominated by the families Dothideomycetes or Pezizomycotina, were lower in

525 chlorinated drippers whereas the Sordariomycetes family was mainly present in the chlorinated  
526 biofilms.

527 *Impact of the interruption of the cleaning method on the bacterial community composition*

528 SIMPER analysis at 104 days showed that there was no difference between C and the  
529 other conditions (Table S8), which confirmed that bacterial communities converged (Figure 7)  
530 when the treatments were stopped.

531 Chloroflexi and Planctomycetes phyla increased in the biofilms of the chlorinated  
532 drippers from Cl and PFCl lines when chlorination was stopped (Figure 8A). The genera and  
533 taxonomic groups belonging to Chloroflexi such as the Anaerolineaceae member's family,  
534 *Leptolinea*, SBR2076 and SJA-15 groups settled in chlorinated dripper biofilms. Other minor  
535 bacterial families in chlorinated drippers during the cleaning period re-emerged such as  
536 Saprospiraceae (Bacteroidetes), Spirochaetaceae (Spirochaetae), Christensenellaceae  
537 (Firmicutes) and Hydrogenophilaceae ( $\beta$ -Proteobacteria) at levels similar to biofilms from non-  
538 chlorinated drippers (Figure 9). Inversely, the relative abundance of the main genera from  
539 chlorinated biofilm during the cleaning period decreased for *Azospira*, *Flavobacterium* and  
540 *Cloacibacterium* (Figure 9).

541 A shift was observed between the bacterial compositions from the C drippers at 104  
542 days compared to 71 days mainly due to the increase of the relative abundances of Chloroflexi  
543 (from 3% to 14%) and Actinobacteria (from 3 to 8.5%), which were higher than in the other  
544 conditions (p-value < 0.05). On the contrary, the relative abundance of Bacteroidetes phylum  
545 (represented by *Terrimonas* genus) decreased from 37% to 16%. The dominant genera already  
546 found during the cleaning period increased such as *Dechloromonas* and *Aquabacterium* ( $\beta$ -  
547 Proteobacteria) (p-value > 0.05), which could explain the decrease of 1/Simpson's index  
548 observed (Table 4). The relative abundances of Chloroflexi, mainly composed of

549 Anaerolineaceae member's family, and Actinobacteria were higher in the C condition than in  
 550 the others.  
 551

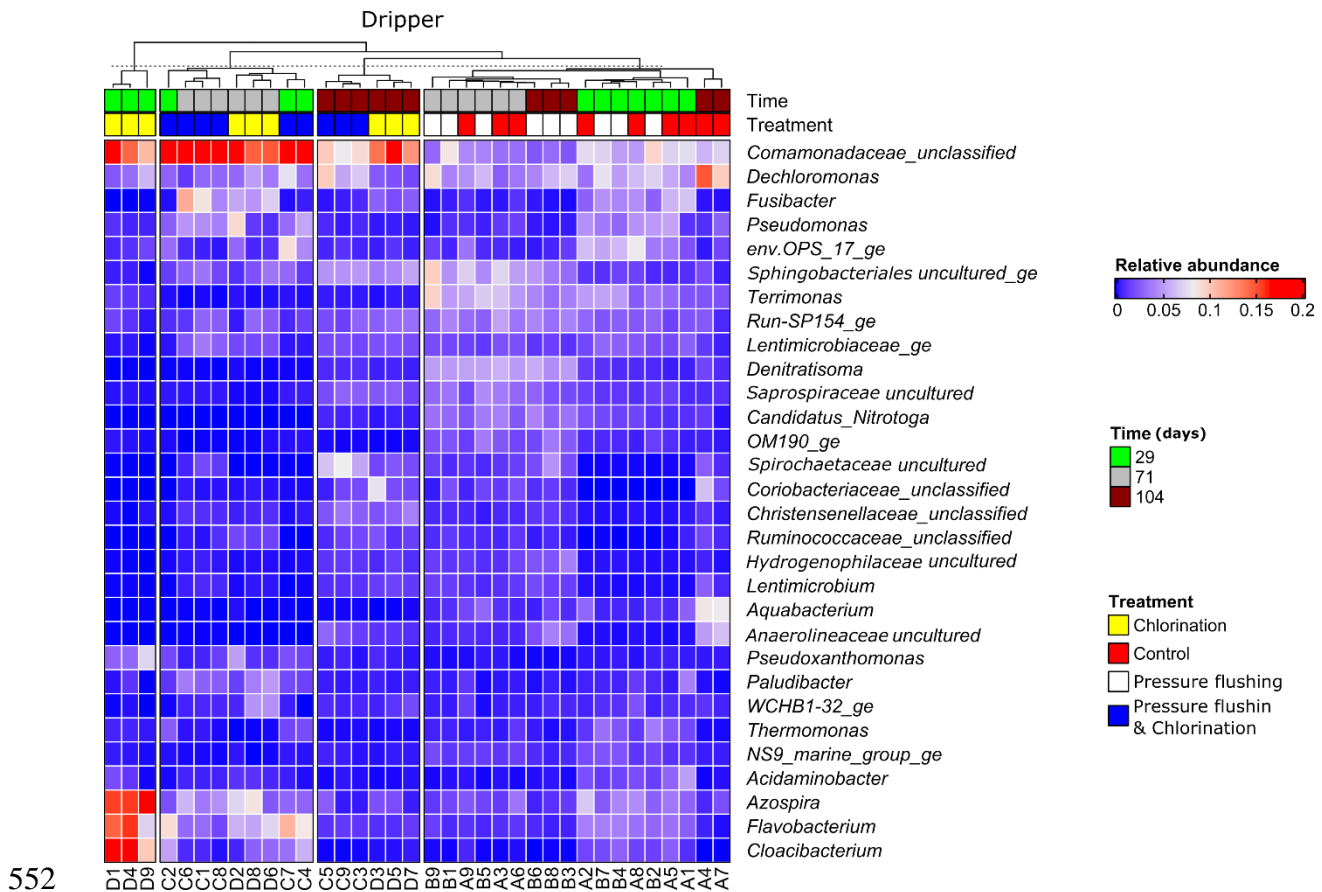

553 **Figure 9 Heat map of bacterial genera from dripper biofilms.** Genera with the top 30  
 554 relative abundance are shown.

555

#### 556 4. Discussion

557 In this study, the effect on biological clogging and microbial communities of different cleaning  
 558 methods (chlorination (CI), pressure flushing (PF), and a combination of both methods (PFCI))  
 559 was investigated. Commercial flat drippers ( $1 \text{ l.h}^{-1}$ ) used in agriculture were installed on a test  
 560 bench and supplied with reclaimed wastewater. After a 2-month period of treatments, cleaning  
 561 events were interrupted in order to study the impact on biofouling regrowth and bacterial  
 562 communities.

563

564 **Chlorination but not purge-only treatment helped maintain flow rates**

565 The effectiveness of cleaning methods is often looked at through flow maintenance (Feng et  
566 al., 2018; Han et al., 2018; Song et al., 2017). Chlorination (1.5 ppm) used alone or in  
567 combination with pressure flushing (Cl and PFCI), maintained flow rates and reduced  
568 distribution heterogeneity throughout the cleaning period. In contrast, the uniformity of water  
569 distribution decreased over time under non-chlorinated conditions (C and PF), meaning that  
570 using chlorination is preferable to maintain the expected flow rates. Chlorination results were  
571 consistent with those of J. Li et al. (2010) who showed that chlorinating to 2.5 ppm free chlorine  
572 once a week maintained the expected dripper flow rates supplied by reclaimed wastewater for  
573 a longer period of time. However, the impact of the pressure flushing is not consistent with Yu  
574 et al., (2018) who showed that increasing the pressure from 0.1MPa to 0.3MPa for 2 minutes  
575 helped maintain the expected flow rates longer by removing large particles ( $< 6.6 \mu\text{m}$  in  
576 diameter). However, the biofilm is considered to be an elastically deformable but quasi-static  
577 structure, allowing it to deal with an increase of pressure and flow velocity (Piciooreanu et al.,  
578 2018). Moreover, biofilms can increase the pressure loss due to friction along the labyrinth (Li  
579 et al., 2016): the biofilm formed in the labyrinth increases roughness, which in turn increases  
580 friction, resulting in increased flow resistance and thus increased the pressure loss with a  
581 consequent decrease in the uniformity of the distribution. Thus, in the case of the pressure  
582 flushing condition, the increase in pressure may not have been sufficient to promote a  
583 detachment of biofilm and maintain flow rates.

584

585 **Impact of the cleaning procedures on biofouling**

586 Purging had no impact on bacterial concentration and biofouling (volume, thickness). A recent  
587 study showed that flushing (1h per day) with reclaimed wastewater is not effective in limiting

588 the clogging of drippers compared to flushing with fresh water due to the presence of suspended  
589 solids and other organic compounds (N. Li et al., 2019). Thus, the use of freshwater could be a  
590 solution to improve the efficiency of the pressure flushing method. However in the case of field  
591 irrigation with treated wastewater it is not always possible to have access to a second water  
592 resource.

593 Conversely, the level of biofouling and bacterial concentration in the chlorinated lines (Cl and  
594 PFCI), mainly in the PFCI line, tended to decrease compared to non-chlorinated lines. The  
595 combination of pressure flushing and chlorination seemed to better control biofouling than  
596 chlorination alone. This decrease was mainly due to a significant decrease in biofouling in the  
597 middle of the channel, where the flow velocity was higher (Ait-Mouheb et al., 2018; Al-  
598 Muhammad et al., 2016; Yu et al., 2018a). Increasing the flow velocity by increasing the  
599 pressure promotes mass transfer (Beyenal and Lewandowski, 2002; Moreira et al., 2013) and  
600 influences mixing (Khaydarov et al., 2018; Naher et al., 2011). Mathieu et al. (2014) showed  
601 in a rotating disc reactor that the shear stress and cohesive force necessary to detach the biofilm  
602 decreased after chlorine application (10 ppm during 1h). This is probably due to breaking the  
603 hydrogen bond, polymer and hydrophobic interactions caused by chlorine (Xue and Seo, 2013),  
604 which weakens the biofilm and makes it easier to detach. Thus, chlorine mass transfer caused  
605 by hydrodynamic conditions in the main flow zones (middle of the milli-channel) may explain  
606 why biofouling level was lower under PFCI conditions than in the C and PF conditions in the  
607 middle and corners of the channel and why bacterial concentration was lower in this condition.  
608 However, the combination of the two methods did not completely suppress the development of  
609 biofouling. One explanation is that the increase in the PFCI condition favours the compaction  
610 of the biofilm and the resistance of the basal layer in the central and corner areas (Blauert et al.,  
611 2015; Rochex et al., 2008; Valladares Linares et al., 2016; Wagner and Horn, 2017), which  
612 reduced the chlorine effect (Lee et al., 2018). Lee et al. (2018) showed that the free chlorine

613 penetration at 10 ppm of Cl<sub>2</sub> was low in a biofilm of 2000 µm (7 days to reach the substratum)  
614 and tended to promote the sloughing of the superficial layers of the biofilm. Thus, the  
615 concentration of free chlorine used (1.5 ppm) may be insufficient to reduce the level of  
616 clogging, especially in corner areas where the thickness was higher.

617

### 618 **Chlorination strongly modified microbial communities in biofilms**

619 In this study, total bacteria, diversity and richness index increased with the level of clogging.  
620 The bacterial diversity was lower in chlorinated conditions compared to the control and pressure  
621 flushing line. The diversity of the biofilms of drinking water distribution pipes was also  
622 previously shown to decrease with the increasing concentration of chlorine (0.05 to 1.76 ppm)  
623 (Fish and Boxall, 2018; Mi et al., 2015).

624 No effect of the pressure flushing on the bacterial community was found in comparison  
625 with the non-treated control line, which is consistent with Li et al. (2015) who studied the  
626 microbial composition of biofilms by PLFAs analysis. On the other hand, the use of chlorine,  
627 combined or not with pressure flushing, has significantly altered the structure of the bacterial  
628 community during the cleaning step. Proteobacteria and Firmicutes phyla appeared to contain  
629 bacterial members resistant to chlorine treatment whereas Chloroflexi phylum appeared to be  
630 sensitive to chlorine which is consistent with Song et al. (2019). Chloroflexi phylum includes  
631 many filamentous bacteria such as Anaerolineaceae member's family and *Leptolinea* genus  
632 detected in sequencing data and responsible for clogging membrane bioreactors in wastewater  
633 treatment plants (Li et al., 2008) and drippers supplied by RWW (Lequette et al., 2019).  
634 Chloroflexi may have a key role in the clogging of drippers.

635 Chlorinated dripper biofilms were largely dominated by OTUs belonging to the  
636 Comamonadaceae family (β-Proteobacteria), followed by *Flavobacterium* (Bacteroidetes),  
637 *Pseudomonas* and *Pseudoxanthomonas* genera (γ-Proteobacteria). β-Proteobacteria are



638 frequently found in chlorinated drinking distribution systems and wastewater biofilms  
639 (Douterelo et al., 2016; Navarro et al., 2016; Shaw et al., 2014) and their abundance can increase  
640 with the chlorine concentration (Wang et al., 2019b). The Comamonadaceae family was  
641 commonly found in water and chlorinated biofilms (Wang et al., 2019a; Zhang et al., 2019).  
642 *Pseudomonas* and *Hydrogenophaga* (Comamonadaceae) are known to exhibit resistance to  
643 disinfection (Jia et al., 2015; Wang et al., 2019a). Increases in relative abundance of  
644 *Pseudomonas* have been observed in water samples after chlorination (Jia et al., 2015) and  
645 *Hydrogenophaga* are known to colonise chlorinated distribution pipes fed with reclaimed  
646 wastewater (Wang et al., 2019b).

647 Firmicutes predominated in the chlorinated drippers after 2 months of treatment. At the  
648 class level, it was mainly composed of Clostridia (abundance between 10 and 14%), which  
649 includes many members capable of producing endospores. These endospores are highly  
650 resistant to a variety of environmental challenges, such as heat, solvents, oxidising agents, UV  
651 irradiation and desiccation (Abecasis et al., 2013). The resilience of endospores allows them to  
652 remain viable in a hostile environment for long periods of time, and contributes to their survival  
653 and proliferation in chlorinated environments (Douterelo et al., 2016).

654 The eukaryotic communities, mainly composed of Ciliophora and Fungi, were also  
655 influenced by the use of chlorine. Sordariomycetes, Tremellomycetes and Chytridiomycetes  
656 were still present in chlorinated biofilms, when Dothideomycetes or Pezizomycotina were only  
657 recovered in control and purge drippers. Sordariomycetes, Tremellomycetes and  
658 Chytridiomycetes are commonly found in the effluent of wastewater treatment plants and are  
659 involved in water treatment (Assres et al., 2019). Sordariomycetes has also been detected as  
660 dominant in biofilms from drinking water distribution systems (0.05 ppm to 0.8 ppm of free  
661 chlorine) (Fish and Boxall, 2018). These results suggest that among fungi, some are more  
662 tolerant to chemical disinfection. The resistance to chemical disinfection of some fungi can be

663 explained by their thick melanized cell walls, which increases resistance to mechanical damage  
664 and limits the intrusion of biocides into the cell (Hageskal et al., 2012) or their ability to form  
665 spores (Sonigo et al., 2011). Ciliophora were affected by the use of chlorine, with chlorine-  
666 sensitive families (e.g. Tokophryidae) whereas others were still present in chlorinated drippers  
667 (e.g. Vorticellidae). Ciliophora contains predators of bacteria and can significantly reduce the  
668 concentration of the bacteria (Parry et al., 2007) and influences the morphology of biofilms  
669 (Böhme et al., 2009; Derlon et al., 2012). Although eukaryotic communities from dripper  
670 biofilms are poorly studied, their role in biofilm development and resistance to cleaning  
671 processes may be important, and must be integrated in studies on the control of biofilms.

672

### 673 **Resilience of microbial communities once treatments are stopped**

674 After 1 month without cleaning events, several bacterial families detected as chlorine-sensitive  
675 re-emerged such as Saprospiraceae, Spirochaetaceae, Christensenellaceae and  
676 Hydrogenophilaceae at levels similar to biofilms from non-chlorinated drippers. The relative  
677 abundance of Chloroflexi phylum also increased significantly after this period. The  
678 concentration of bacteria and diversity and richness indexes also increased. This indicates that  
679 stopping treatments reduces selection pressure and makes it easier to recruit new species. Fish  
680 and Boxall (2018) have found a similar result in the case of biofilms developing in drinking  
681 water distribution systems and this would explain the increase of clogging of drippers after the  
682 interruption of chlorination observed by Katz et al. (2014) (10 ppm of free chlorine). This also  
683 illustrates the “resilient” ability of the bacterial community to deal with the chlorine used  
684 (Allison and Martiny, 2009) in a drip irrigation system. However, PCoA analyses showed that  
685 the drippers in the chlorinated lines still form a different cluster than non-chlorinated lines 1  
686 month after stopping the treatment, showing that the history of the treatment still affects the  
687 structure of the communities and that the resilience was only partial.

## 688 **5. Conclusion**

689 The combined use of OCT and high throughput sequencing highlighted the impact of  
690 the two cleaning procedures (pressure flushing, chlorination) on biofouling of drip irrigation  
691 systems supplied by RWW:

- 692 - The pressure flushing method alone did not reduce the biofouling of the drippers  
693 and did not influence the microbiome of the biofilm.
- 694 - On the other hand, chlorination application alone or combined with pressure  
695 flushing steps reduced biofouling of the drippers, mainly in the main flow zone.
- 696 - Some bacteria commonly found to clog systems such as Chloroflexi and  
697 Planctomycetes appear to be sensitive to chlorine and regrowth after chlorination is  
698 discontinued.
- 699 - Inversely, others are more resistant such as the members of the Comamonadaceae  
700 and Clostridia (Firmicutes). Further research into the mechanisms of resistance is  
701 needed to improve the control of biofilms.
- 702 - The suspension of treatment leads to an increase in the bacterial diversity of the  
703 initially chlorinated biofilms and a convergence of the communities towards non-  
704 chlorinated biofilms, although differences in the structure remains. This indicates  
705 that the bacterial community is resilient to chlorine, but that the community at a  
706 global scale keeps the ‘memory’ of the chlorination.

707 As indicated, the concentration of chlorine used may have been a determining factor, especially  
708 in low-velocity vortex areas where the thickness of the biofouling was higher. Further studies  
709 on chlorine transfer, whether or not combined with purging, would allow a better understanding  
710 of the mechanisms of biofilm maintenance in these systems. In addition, the microbiome of  
711 reclaimed water evolved in time and depended on the treatment used. For this reason, additional  
712 studies to investigate the effect of the wastewater treatment (i.e. activated sludge, membrane

713 bioreactor) as well as the role of bacterial predators on the microbial composition of a biofilm,  
714 have to be performed.

## 715 **6. Conclusion**

716 The combined use of OCT and high throughput sequencing highlighted the impact of  
717 cleaning procedures (pressure flushing, chlorination) on biofouling of drip irrigation systems  
718 supplied by RWW:

- 719 - Pressure flushing method alone did not reduce the biofouling of the drippers and did  
720 not influence the microbiome of the biofilm.
- 721 - On the contrary, chlorination application alone or combined with pressure flushing  
722 step reduced biofouling of the dripper, mainly in the main flow zone.
- 723 - Some bacteria commonly found in clogging systems such as Chloroflexi and  
724 Planctomycetes appear to be sensitive to chlorine but re-grow after chlorination is  
725 discontinued.
- 726 - Inversely, others are more resistant such as Comamonadaceae member's family and  
727 Clostridia (Firmicutes). Further research into the mechanisms of resistance would  
728 improve the control of biofilms.
- 729 - The suspension of treatments leads to an increase in the bacterial diversity of the  
730 initially chlorinated biofilms and a convergence of the communities towards non-  
731 chlorinated biofilms, although differences in the structure remains. This indicates  
732 that the bacterial community is resilient to chlorine, but that the community at a  
733 global scale keep the 'memory' of the chlorination.

734 As indicated, the concentration of chlorine used may have been a determining factor, especially  
735 in low velocity vortex areas where the thickness of the biofouling was higher. Further studies  
736 on chlorine transfer, whether or not combined with purging, would allow a better understanding  
737 of the mechanisms of biofilm maintenance in these systems. In addition, the microbiome of

738 reclaimed water evolved in time and depends on the treatment used. For this reason, additional  
739 studies to investigate the effect of the wastewater treatment (ie activated sludge, membrane  
740 bioreactor) as well as the role of bacterial predators on the microbial composition of a biofilm,  
741 have to be performed.

## 742 **Acknowledgements**

743 The authors gratefully acknowledge the financial support of the French Water Agency, project  
744 “Experimental platform for the reuse of reclaimed wastewater in irrigation, Murviel-lès-  
745 Montpellier” (Project 2017-1399). We thank Guillaume Guizard (LBE-INRAE, Narbonne,  
746 France) and Jean-François Bonicel (UMR ITAP-INRAE, Montpellier, France) for their  
747 contribution to the development of the dripper system and Annabelle Mange (UMR G-Eau-  
748 INRAE, Montpellier, France) for their assistance.

## 749 **Disclosure statement**

750 No potential conflict of interest was reported by the authors. Authors have approved the final  
751 article.

## 752 **References**

- 753 Abecasis, A.B., Serrano, M., Alves, R., Quintais, L., Pereira-Leal, J.B., Henriques, A.O.,  
754 2013. A genomic signature and the identification of new sporulation genes. *J. Bacteriol.*  
755 195, 2101–2115. <https://doi.org/10.1128/JB.02110-12>
- 756 Ait-mouheb, N., Mayaux, P., Mateo-sagasta, J., Hartani, T., 2020. Water Reuse : a resource  
757 for Mediterranean Agriculture. *Water Resour. Mediterr. Reg.* 1–25.
- 758 Ait-Mouheb, N., Schillings, J., Al-Muhammad, J., Bendoula, R., Tomas, S., Amielh, M.,  
759 Anselmet, F., 2018. Impact of hydrodynamics on clay particle deposition and biofilm  
760 development in a labyrinth-channel dripper. *Irrig. Sci.* 0, 0.  
761 <https://doi.org/10.1007/s00271-018-0595-7>

- 762 Al-Muhammad, J., Tomas, S., Ait-Mouheb, N., Amielh, M., Anselmet, F., 2019.  
763 Experimental and numerical characterization of the vortex zones along a labyrinth milli-  
764 channel used in drip irrigation. *Int. J. Heat Fluid Flow* 80, 108500.  
765 <https://doi.org/10.1016/j.ijheatfluidflow.2019.108500>
- 766 Al-Muhammad, J., Tomas, S., Anselmet, F., 2016. Modeling a weak turbulent flow in a  
767 narrow and wavy channel: case of micro-irrigation. *Irrig. Sci.* 34, 361–377.  
768 <https://doi.org/10.1007/s00271-016-0508-6>
- 769 Allison, S.D., Martiny, J.B.H., 2009. Resistance, resilience, and redundancy in microbial  
770 communities. *Light Evol.* 2, 149–166. <https://doi.org/10.17226/12501>
- 771 Assress, H.A., Selvarajan, R., Nyoni, H., Ntushelo, K., Mamba, B.B., Msagati, T.A.M., 2019.  
772 Diversity, Co-occurrence and Implications of Fungal Communities in Wastewater  
773 Treatment Plants. *Sci. Rep.* 9, 1–15. <https://doi.org/10.1038/s41598-019-50624-z>
- 774 Batista, R., Soares, A., Marin, O., Souza, J., Sartori, M., Batista, R., 2009. Efficiency of  
775 chemical treatments in preventing the clogging of drippers by applying treated sanitary  
776 sewerage. *DYNA* 76, 149–157.
- 777 Beyenal, H., Lewandowski, Z., 2002. Internal and external mass transfer in biofilms grown at  
778 various flow velocities. *Biotechnol. Prog.* 18, 55–61. <https://doi.org/10.1021/bp010129s>
- 779 Blauert, F., Horn, H., Wagner, M., 2015. Time-resolved biofilm deformation measurements  
780 using optical coherence tomography. *Biotechnol. Bioeng.* 112, 1893–1905.  
781 <https://doi.org/10.1002/bit.25590>
- 782 Böhme, A., Risse-Buhl, U., Küsel, K., 2009. Protists with different feeding modes change  
783 biofilm morphology. *FEMS Microbiol. Ecol.* 69, 158–169.  
784 <https://doi.org/10.1111/j.1574-6941.2009.00710.x>
- 785 Chao, A., 1984. Non-parametric estimation of the classes in a population. *Scand. J. Stat.* 11,  
786 265–270. <https://doi.org/10.2307/4615964>

- 787 Chauhdary, J.N., Bakhsh, A., Ahmad, N., Mehmood, K., 2015. Optimizing chlorine use for  
788 improving performance of drip irrigation system under biologically contaminated water  
789 source. *Pakistan J. Agric. Sci.* 52, 829–835.
- 790 Clarke, K.R., 1993. Non-parametric multivariate analyses of changes in community structure.  
791 *Aust. J. Ecol.* 18, 117–143. <https://doi.org/10.1071/WR9840181>
- 792 Dehghanisanij, H., Yamamoto, T., Ahmad, B.O., Fujiyama, H., Miyamoto, K., 2005. The  
793 effect of chlorine on emitter clogging induced by algae and protozoa and the  
794 performance of drip irrigation. *Trans. ASAE* 48, 519–527.  
795 <https://doi.org/10.13031/2013.18326>
- 796 Derlon, N., Peter-Varbanets, M., Scheidegger, A., Pronk, W., Morgenroth, E., 2012.  
797 Predation influences the structure of biofilm developed on ultrafiltration membranes.  
798 *Water Res.* 46, 3323–3333. <https://doi.org/10.1016/j.watres.2012.03.031>
- 799 Douterelo, I., Husband, S., Loza, V., Boxall, J., 2016. Dynamics of biofilm regrowth in  
800 drinking water distribution systems. *Appl. Environ. Microbiol.* 82, 4155–4168.  
801 <https://doi.org/10.1128/AEM.00109-16>
- 802 Duran-Ros, M., Puig-Bargués, J., Arbat, G., Barragán, J., Cartagena, F.R. de, 2009. Effect of  
803 filter, emitter and location on clogging when using effluents. *Agric. Water Manag.* 96,  
804 67–79. <https://doi.org/10.1016/j.agwat.2008.06.005>
- 805 Edgar, R.C., Haas, B.J., Clemente, J.C., Quince, C., Knight, R., 2011. UCHIME improves  
806 sensitivity and speed of chimera detection. *Bioinformatics* 27, 2194–2200.  
807 <https://doi.org/10.1093/bioinformatics/btr381>
- 808 Feng, D., Kang, Y., Wan, S., Liu, S., 2017. Lateral flushing regime for managing emitter  
809 clogging under drip irrigation with saline groundwater. *Irrig. Sci.* 35, 217–225.  
810 <https://doi.org/10.1007/s00271-017-0536-x>
- 811 Fish, K.E., Boxall, J.B., 2018. Biofilm microbiome (re)growth dynamics in drinking water

- 812 distribution systems are impacted by chlorine concentration. *Front. Microbiol.* 9, 1–21.  
813 <https://doi.org/10.3389/fmicb.2018.02519>
- 814 Goyal, M.R., 2018. Wastewater Management for Irrigation, Wastewater Management for  
815 Irrigation. <https://doi.org/10.1201/b18967>
- 816 Green, O., Katz, S., Tarchitzky, J., Chen, Y., 2018. Formation and prevention of biofilm and  
817 mineral precipitate clogging in drip irrigation systems applying treated wastewater. *Irrig.*  
818 *Sci.* 0, 1–14. <https://doi.org/10.1007/s00271-018-0581-0>
- 819 Hadziavdic, K., Lekang, K., Lanzen, A., Jonassen, I., Thompson, E.M., Troedsson, C., 2014.  
820 Characterization of the 18s rRNA gene for designing universal eukaryote specific  
821 primers. *PLoS One* 9. <https://doi.org/10.1371/journal.pone.0087624>
- 822 Hageskal, G., Tryland, I., Liltved, H., Skaar, I., 2012. No simple solution to waterborne fungi:  
823 various responses to water disinfection methods. *Water Supply* 12, 220–226.  
824 <https://doi.org/10.2166/ws.2012.131>
- 825 Han, S., Li, Y., Xu, F., Sun, D., Feng, J., Liu, Z., Wu, R., Wang, Z., 2018. Effect of Lateral  
826 Flushing on Emitter Clogging under Drip Irrigation with Yellow River Water and a  
827 Suitable Method. *Irrig. Drain.* 67, 199–209. <https://doi.org/10.1002/ird.2193>
- 828 J. Li, L. Chen, Y. Li, J. Yin, H. Zhang, 2010. Effects of Chlorination Schemes on Clogging in  
829 Drip Emitters during Application of Sewage Effluent. *Appl. Eng. Agric.* 26, 565–578.  
830 <https://doi.org/10.13031/2013.32067>
- 831 Jia, S., Shi, P., Hu, Q., Li, B., Zhang, T., Zhang, X.-X., 2015. Bacterial Community Shift  
832 Drives Antibiotic Resistance Promotion during Drinking Water Chlorination. *Environ.*  
833 *Sci. Technol.* 49, 12271–12279. <https://doi.org/10.1021/acs.est.5b03521>
- 834 Katz, S., Dosoretz, C., Chen, Y., Tarchitzky, J., 2014. Fouling formation and chemical control  
835 in drip irrigation systems using treated wastewater. *Irrig. Sci.* 32, 459–469.  
836 <https://doi.org/10.1007/s00271-014-0442-4>



- 837 Khaydarov, V., Borovinskaya, E.S., Reschetilowski, W., 2018. Numerical and experimental  
838 investigations of a micromixer with chicane mixing geometry. *Appl. Sci.* 8, 3–6.  
839 <https://doi.org/10.3390/app8122458>
- 840 Lamm, F.R., 2013. Effect of Flushing Velocity and Flushing Duration on Sediment Transport  
841 in Microirrigation Driplines. *Trans. ASABE* 56, 1821–1828.  
842 <https://doi.org/10.13031/trans.56.10293>
- 843 Lamm, F.R., Ayars, J.E., Nakayama, F.S., 2007. Maintenance, in: Lamm, F.R., Ayars, J.E.,  
844 Nakayama, F.S. (Eds.), *Microirrigation for Crop Production: Design, Operation, and*  
845 *Management*, 13th Edn. Elsevier B.V., Amsterdam, pp. 1–643.
- 846 Lee, W.H., Pressman, J.G., Wahman, D.G., 2018. Three-Dimensional Free Chlorine and  
847 Monochloramine Biofilm Penetration: Correlating Penetration with Biofilm Activity and  
848 Viability. *Environ. Sci. Technol.* 52, 1889–1898. <https://doi.org/10.1021/acs.est.7b05215>
- 849 Lequette, K., Ait-Mouheb, N., Wéry, N., 2020. Hydrodynamic effect on biofouling of milli-  
850 labyrinth channel and bacterial communities in drip irrigation systems fed with  
851 reclaimed wastewater. *Sci. Total Environ.* 738, 139778.  
852 <https://doi.org/10.1016/j.scitotenv.2020.139778>
- 853 Lequette, K., Ait-Mouheb, N., Wéry, N., 2019. Drip irrigation biofouling with treated  
854 wastewater: bacterial selection revealed by high-throughput sequencing. *Biofouling* 35,  
855 217–229. <https://doi.org/10.1080/08927014.2019.1591377>
- 856 Li, C., Wagner, M., Lackner, S., Horn, H., 2016. Assessing the influence of biofilm surface  
857 roughness on mass transfer by combining optical coherence tomography and two-  
858 dimensional modeling. *Biotechnol. Bioeng.* 113, 989–1000.  
859 <https://doi.org/10.1002/bit.25868>
- 860 Li, J., Chen, L., Li, Y., Yin, J., Zhang, H., 2009. Effects of chloration schemes on clogging in  
861 drip emitters during application of sewage effluent. *Appl. Eng. Agric.*

- 862 Li, J., Li, Y., Ohandja, D.G., Yang, F., Wong, F.S., Chua, H.C., 2008. Impact of filamentous  
863 bacteria on properties of activated sludge and membrane-fouling rate in a submerged  
864 MBR. *Sep. Purif. Technol.* 59, 238–243. <https://doi.org/10.1016/j.seppur.2007.06.011>
- 865 Li, N., Kang, Y., Li, X., Wan, S., Zhang, C., Wang, X., 2019. Lateral flushing with fresh  
866 water reduced emitter clogging in drip irrigation with treated effluent. *Irrig. Sci.* 37, 627–  
867 635. <https://doi.org/10.1007/s00271-019-00637-3>
- 868 Li, Y., Li, J., 2009. Effects of chlorination on emitter clogging and tomato yield and nitrogen  
869 uptake in a drip irrigation system with sewage effluent. *Am. Soc. Agric. Biol. Eng.*  
870 *Annu. Int. Meet.* 2009, ASABE 2009 4, 2531–2543.  
871 <https://doi.org/10.13031/2013.27047>
- 872 Li, Y., Pan, J., Chen, X., Xue, S., Feng, J., Muhammad, T., Zhou, B., 2019. Dynamic effects  
873 of chemical precipitates on drip irrigation system clogging using water with high  
874 sediment and salt loads. *Agric. Water Manag.* 213, 833–842.  
875 <https://doi.org/10.1016/j.agwat.2018.11.021>
- 876 Li, Y., Song, P., Pei, Y., Feng, J., 2015. Effects of lateral flushing on emitter clogging and  
877 biofilm components in drip irrigation systems with reclaimed water. *Irrig. Sci.* 33, 235–  
878 245. <https://doi.org/10.1007/s00271-015-0462-8>
- 879 Li, Y., Zhou, B., Liu, Y., Jiang, Y., Pei, Y., Shi, Z., 2013. Preliminary surface topographical  
880 characteristics of biofilms attached on drip irrigation emitters using reclaimed water.  
881 *Irrig. Sci.* 31, 557–574. <https://doi.org/10.1007/s00271-012-0329-1>
- 882 Li, Z., Yu, L., Li, N., Chang, L., Cui, N., 2018. Influence of flushing velocity and flushing  
883 frequency on the service life of labyrinth-channel emitters. *Water (Switzerland)* 10.  
884 <https://doi.org/10.3390/w10111630>
- 885 Mathieu, L., Bertrand, I., Abe, Y., Angel, E., Block, J.C., Skali-Lami, S., Francius, G., 2014.  
886 Drinking water biofilm cohesiveness changes under chlorination or hydrodynamic stress.

- 887 Water Res. 55, 175–184. <https://doi.org/10.1016/j.watres.2014.01.054>
- 888 McMurdie, P., Holmes, S., 2012. PHYLOSEQ: a bioconductor package for handling and  
889 analysis of high-throughput phylogenetic sequence data. *Pac Symp Biocomput* 235–246.
- 890 Megh R. Goyal, Chavan, V.K., Tripathi, V.K., 2015. Principles and Management of Clogging  
891 in Micro Irrigation. Apple Academic Press ; Boca Raton.
- 892 Mi, Z., Dai, Y., Xie, S., Chen, C., Zhang, X., 2015. Impact of disinfection on drinking water  
893 biofilm bacterial community. *J. Environ. Sci. (China)* 37, 200–205.  
894 <https://doi.org/10.1016/j.jes.2015.04.008>
- 895 Moreira, J.M.R., Teodósio, J.S., Simões, M., Melo, L.F., Mergulhão, F.J., 2013. Biofilm  
896 formation under turbulent conditions: external mass transfer versus shear stress. *Int.*  
897 *Conf. Heat Exch. Fouling Clean.* 2013, 200–204.
- 898 Naher, S., Orpen, D., Brabazon, D., Poulsen, C.R., Morshed, M.M., 2011. Effect of micro-  
899 channel geometry on fluid flow and mixing. *Simul. Model. Pract. Theory* 19, 1088–  
900 1095. <https://doi.org/10.1016/j.simpat.2010.12.008>
- 901 Navarro, R.R., Hori, T., Inaba, T., Matsuo, K., Habe, H., Ogata, A., 2016. High-resolution  
902 phylogenetic analysis of residual bacterial species of fouled membranes after NaOCl  
903 cleaning. *Water Res.* 94, 166–175. <https://doi.org/10.1016/j.watres.2016.02.044>
- 904 Nguyen, N.-P., Warnow, T., Pop, M., White, B., 2016. A perspective on 16S rRNA  
905 operational taxonomic unit clustering using sequence similarity. *npj Biofilms*  
906 *Microbiomes* 2, 16004. <https://doi.org/10.1038/npjbiofilms.2016.4>
- 907 Oliveira, F., Lavanholi, R., Camargo, A., Frizzone, A., Ait-Mouheb, N., Tomas, S., Molle, B.,  
908 2017. Influence of Concentration and Type of Clay Particles on Dripper Clogging. *Irrig.*  
909 *Drain. Syst. Eng.* 06, 1–5. <https://doi.org/10.4172/2168-9768.1000184>
- 910 Oliveira, F.C., Lavanholi, R., de Camargo, A.P., Ait-Mouheb, N., Frizzone, J.A., Tomas, S.,  
911 Molle, B., 2020. Clogging of drippers caused by suspensions of kaolinite and

- 912 montmorillonite clays. *Irrig. Sci.* 38, 65–75. <https://doi.org/10.1007/s00271-019-00652-4>
- 913 Parry, J., 2004. Protozoan Grazing of Freshwater Biofilms. *Adv. Appl. Microbiol.* 54.
- 914 <https://doi.org/0065-2164/04>
- 915 Parry, J.D., Holmes, A.K., Unwin, M.E., Laybourn-Parry, J., 2007. The use of ultrasonic
- 916 imaging to evaluate the effect of protozoan grazing and movement on the topography of
- 917 bacterial biofilms. *Lett. Appl. Microbiol.* 45, 364–370. [https://doi.org/10.1111/j.1472-](https://doi.org/10.1111/j.1472-765X.2007.02213.x)
- 918 [765X.2007.02213.x](https://doi.org/10.1111/j.1472-765X.2007.02213.x)
- 919 Piciooreanu, C., Blauert, F., Horn, H., Wagner, M., 2018. Determination of mechanical
- 920 properties of biofilms by modelling the deformation measured using optical coherence
- 921 tomography. *Water Res.* 145, 588–598. <https://doi.org/10.1016/j.watres.2018.08.070>
- 922 Puig-Bargués, J., Arbat, G., Elbana, M., Duran-Ros, M., Barragán, J., de Cartagena, F.R.,
- 923 Lamm, F.R., 2010. Effect of flushing frequency on emitter clogging in microirrigation
- 924 with effluents. *Agric. Water Manag.* 97, 883–891.
- 925 <https://doi.org/http://dx.doi.org/10.1016/j.agwat.2010.01.019>
- 926 Rav-Acha, C., Kummel, M., Salamon, I., Adin, A., 1995. The effect of chemical oxidants on
- 927 effluent constituents for drip irrigation. *Water Res.* 29, 119–129.
- 928 [https://doi.org/10.1016/0043-1354\(94\)E0113-K](https://doi.org/10.1016/0043-1354(94)E0113-K)
- 929 Rizk, N., Ait-Mouheb, N., Molle, B., Roche, N., 2019. Treated wastewater reuse in micro-
- 930 irrigation: effect of shear stress on biofilm development kinetics and chemical
- 931 precipitation. *Environ. Technol.* 0, 1–11.
- 932 <https://doi.org/10.1080/09593330.2019.1625956>
- 933 Rochex, A., Godon, J.J., Bernet, N., Escudié, R., 2008. Role of shear stress on composition,
- 934 diversity and dynamics of biofilm bacterial communities. *Water Res.* 42, 4915–4922.
- 935 <https://doi.org/10.1016/j.watres.2008.09.015>
- 936 Schindelin, J., Arganda-Carrera, I., Frise, E., Verena, K., Mark, L., Tobias, P., Stephan, P.,

- 937 Curtis, R., Stephan, S., Benjamin, S., Jean-Yves, T., Daniel, J.W., Volker, H., Kevin, E.,  
938 Pavel, T., Albert, C., 2009. Fiji - an Open platform for biological image analysis. *Nat.*  
939 *Methods* 9, 241. <https://doi.org/10.1038/nmeth.2019.Fiji>
- 940 Schloss, P.D., Westcott, S.L., Ryabin, T., Hall, J.R., Hartmann, M., Hollister, E.B.,  
941 Lesniewski, R.A., Oakley, B.B., Parks, D.H., Robinson, C.J., Sahl, J.W., Stres, B.,  
942 Thallinger, G.G., Van Horn, D.J., Weber, C.F., 2009. Introducing mothur: open-source,  
943 platform-independent, community-supported software for describing and comparing  
944 microbial communities. *Appl. Environ. Microbiol.* 75, 7537–41.  
945 <https://doi.org/10.1128/AEM.01541-09>
- 946 Shaw, J.L.A., Monis, P., Fabris, R., Ho, L., Braun, K., Drikas, M., Cooper, A., 2014.  
947 Assessing the impact of water treatment on bacterial biofilms in drinking water  
948 distribution systems using high-throughput DNA sequencing. *Chemosphere* 117, 185–  
949 192. <https://doi.org/10.1016/j.chemosphere.2014.06.077>
- 950 Song, P., Li, Y., Zhou, B., Zhou, C., Zhang, Z., Li, J., 2017. Controlling mechanism of  
951 chlorination on emitter bio-clogging for drip irrigation using reclaimed water. *Agric.*  
952 *Water Manag.* 184, 36–45. <https://doi.org/10.1016/j.agwat.2016.12.017>
- 953 Song, P., Zhou, B., Feng, G., Brooks, J.P., Zhou, H., Zhao, Z., Liu, Y., Li, Y., 2019. The  
954 influence of chlorination timing and concentration on microbial communities in labyrinth  
955 channels: implications for biofilm removal. *Biofouling* 1–15.  
956 <https://doi.org/10.1080/08927014.2019.1600191>
- 957 Sonigo, P., Toni, A. De, Reilly, K., 2011. *A Review of Fungi in Drinking Water and the*  
958 *Implications for Human Health.* Paris.
- 959 Tarchitzky, J., Rimon, A., Kenig, E., Dosoretz, C.G., Chen, Y., 2013. Biological and chemical  
960 fouling in drip irrigation systems utilizing treated wastewater. *Irrig. Sci.* 31, 1277–1288.  
961 <https://doi.org/10.1007/s00271-013-0406-0>

- 962 Tsvetanova, Z., 2020. Quantification of the bacterial community of drinking water -  
963 associated biofilms under different flow velocities and changing chlorination regimes.  
964 *Appl. Water Sci.* <https://doi.org/10.1007/s13201-019-1086-6>
- 965 Valladares Linares, R., Wexler, A.D., Bucs, S.S., Dreszer, C., Zwijnenburg, A., Flemming,  
966 H.C., Kruithof, J.C., Vrouwenvelder, J.S., 2016. Compaction and relaxation of biofilms.  
967 *Desalin. Water Treat.* 57, 12902–12914.  
968 <https://doi.org/10.1080/19443994.2015.1057036>
- 969 Wagner, M., Horn, H., 2017. Optical coherence tomography in biofilm research: A  
970 comprehensive review. *Biotechnol. Bioeng.* <https://doi.org/10.1002/bit.26283>
- 971 Wang, J., Gong, S., Xu, D., Yu, Y., Zhao, Y., 2013. Impact of drip and level-basin irrigation  
972 on growth and yield of winter wheat in the North China Plain. *Irrig. Sci.* 31, 1025–1037.  
973 <https://doi.org/10.1007/s00271-012-0384-7>
- 974 Wang, Y., Qian, P.Y., 2009. Conservative fragments in bacterial 16S rRNA genes and primer  
975 design for 16S ribosomal DNA amplicons in metagenomic studies. *PLoS One* 4.  
976 <https://doi.org/10.1371/journal.pone.0007401>
- 977 Wang, Y.H., Wu, Y.H., Tong, X., Yu, T., Peng, L., Bai, Y., Zhao, X.H., Huo, Z.Y., Ikuno, N.,  
978 Hu, H.Y., 2019. Chlorine disinfection significantly aggravated the biofouling of reverse  
979 osmosis membrane used for municipal wastewater reclamation. *Water Res.* 154, 246–  
980 257. <https://doi.org/10.1016/j.watres.2019.02.008>
- 981 Wang, Z., Li, J., Li, Y., 2017. Using Reclaimed Water for Agricultural and Landscape  
982 Irrigation in China: a Review. *Irrig. Drain.* <https://doi.org/10.1002/ird.2129>
- 983 Wei, Z., Cao, M., Liu, X., Tang, Y., Lu, B., 2012. Flow behaviour analysis and experimental  
984 investigation for emitter micro-channels. *Chinese J. Mech. Eng. (English Ed.* 25, 729–  
985 737. <https://doi.org/10.3901/CJME.2012.04.729>
- 986 Xue, Z., Seo, Y., 2013. Impact of chlorine disinfection on redistribution of cell clusters from

- 987 biofilms. *Environ. Sci. Technol.* 47, 1365–1372. <https://doi.org/10.1021/es304113e>
- 988 Yu, L., Li, N., Long, J., Liu, X., Yang, Q., 2018a. The mechanism of emitter clogging  
989 analyzed by CFD–DEM simulation and PTV experiment. *Adv. Mech. Eng.* 10, 1–10.  
990 <https://doi.org/10.1177/1687814017743025>
- 991 Yu, L., Li, N., Yang, Q., Liu, X., 2018b. Influence of Flushing Pressure before Irrigation on  
992 the Anti-Clogging Performance of Labyrinth Channel Emitters. *Irrig. Drain.* 67, 191–  
993 198. <https://doi.org/10.1002/ird.2173>
- 994 Yu, Y., Lee, C., Kim, J., Hwang, S., 2005. Group-specific primer and probe sets to detect  
995 methanogenic communities using quantitative real-time polymerase chain reaction.  
996 *Biotechnol. Bioeng.* 89, 670–679. <https://doi.org/10.1002/bit.20347>
- 997 Zhang, J., Li, W., Chen, J., Wang, F., Qi, W., Li, Y., 2019. Impact of disinfectant on bacterial  
998 antibiotic resistance transfer between biofilm and tap water in a simulated distribution  
999 network. *Environ. Pollut.* 131–140. <https://doi.org/10.1016/j.envpol.2018.11.077>
- 1000 Zhou, B., Wang, D., Wang, T., Li, Y., 2018. Chemical Clogging Behavior in Drip Irrigation  
1001 Systems Using Reclaimed Water. *Trans. ASABE* 61, 1667–1675.  
1002 <https://doi.org/10.13031/trans.12902>
- 1003 Zhou, B., Wang, T., Li, Y., Bralts, V., 2017. Effects of microbial community variation on bio-  
1004 clogging in drip irrigation emitters using reclaimed water. *Agric. Water Manag.* 194,  
1005 139–149. <https://doi.org/10.1016/j.agwat.2017.09.006>
- 1006
- 1007
- 1008
- 1009
- 1010

1011 **Supplementary data**

| Flow rate<br>(l.h <sup>-1</sup> ) | Inlet<br>L x W |     | Return<br>L x W |   | Outlet<br>L x W |     |
|-----------------------------------|----------------|-----|-----------------|---|-----------------|-----|
| 1                                 | 9.5            | 2.5 | 5.2             | 5 | 9.4             | 2.5 |

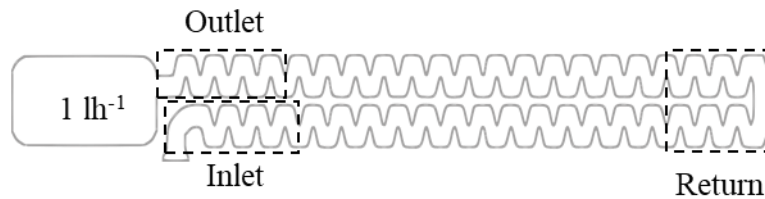

1012

1013 **Figure S1 Measurements of the different areas of the labyrinth. L: length and W: width**

1014

1015

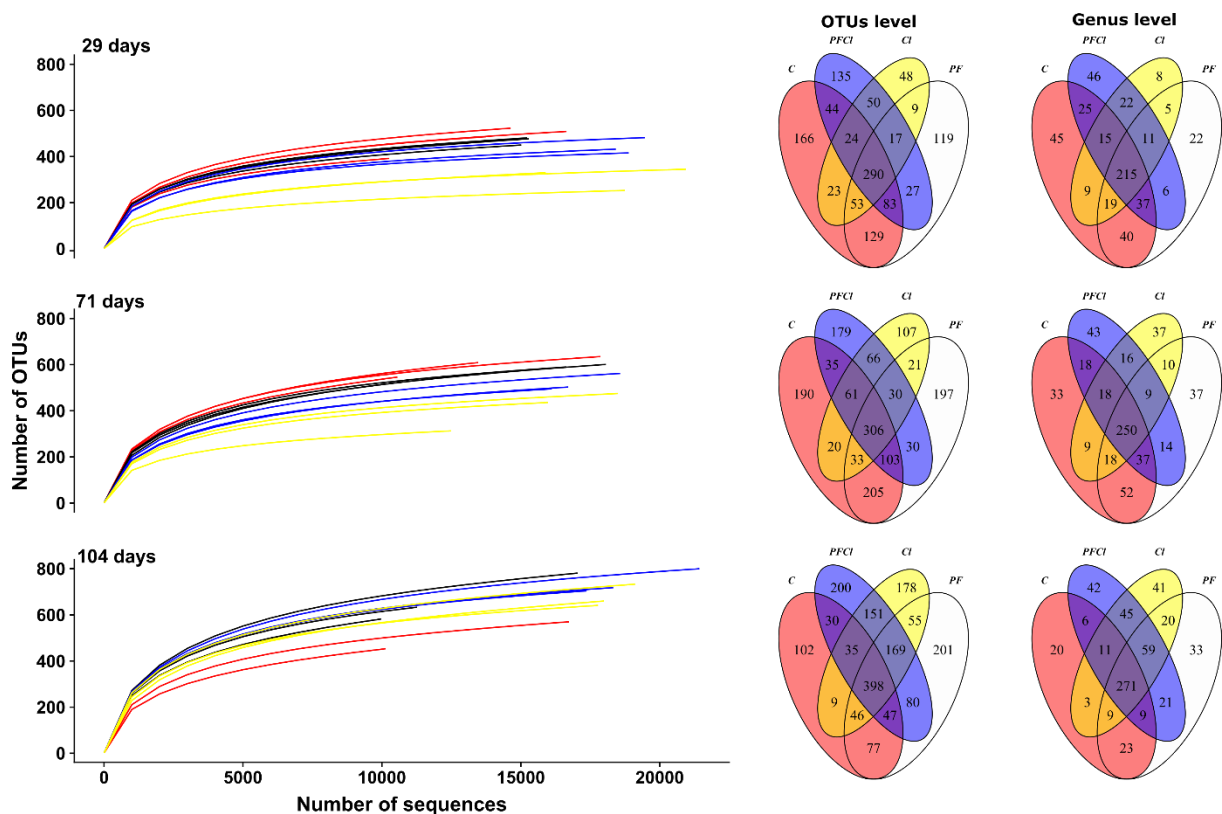

1016

1017 **Figure S2 Rarefaction curves from dripper biofilms and Venn Diagram of bacterial OTUs**  
 1018 **and bacterial genera in time.** (Control: red, Pressure flushing: white, Pressure flushing &  
 1019 Chlorination: blue, Chlorination: yellow).



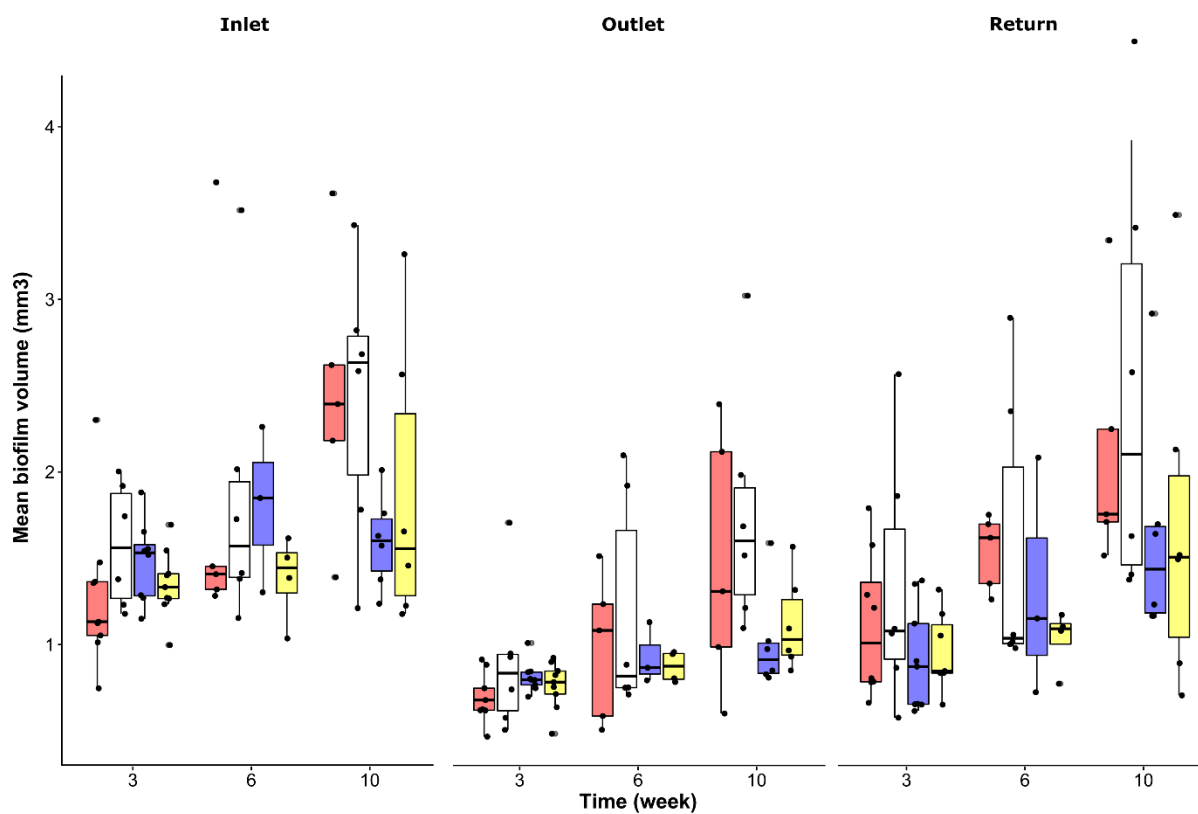

1020

1021 **Figure S3 Biofilm volume during the cleaning period.** Control (●), Pressure flushing (○),  
1022 Chlorination (●) and Pressure flushing/Chlorination (●).

1023

1024

1025

1026

1027

1028

1029

1030

1031

1032

1033

1034

1035

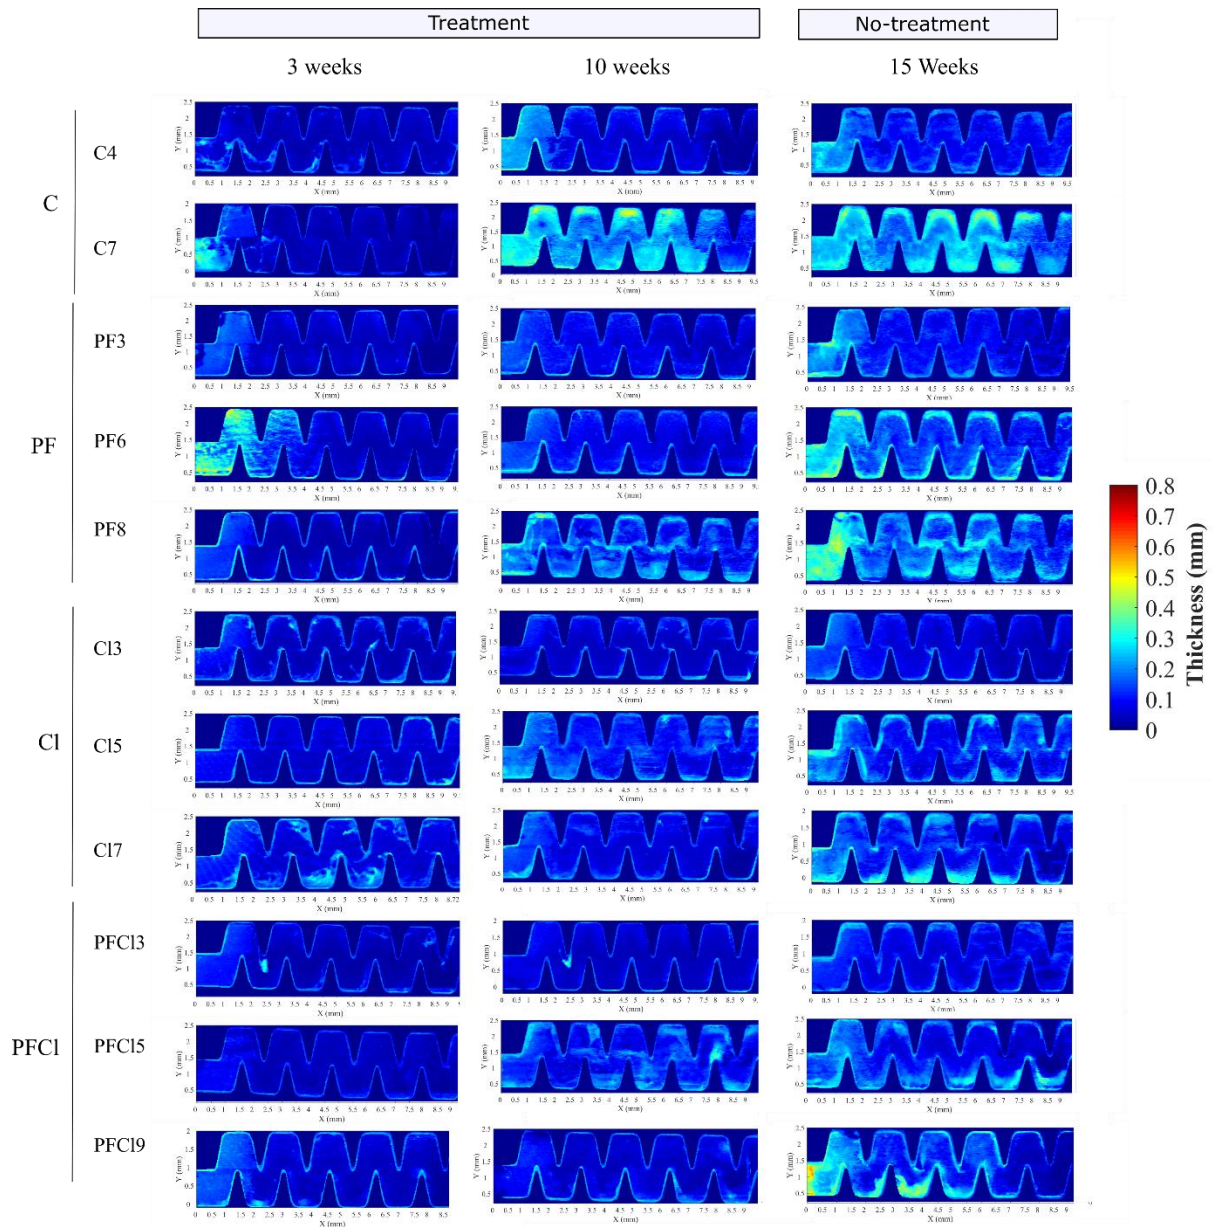

1036

1037 **Figure S4 Biofilm thickness at the outlet of drippers under the C (Control), PF (Pressure**  
 1038 **flushing), CI (Chlorination) and PFCI (Pressure flushing/Chlorination) conditions**  
 1039 **measured at 3, 10 and 15 weeks. The drippers presented are those also analysed by 16S rRNA**  
 1040 **sequencing at 104 days.**

1041

1042

1043

1044

1045

1046

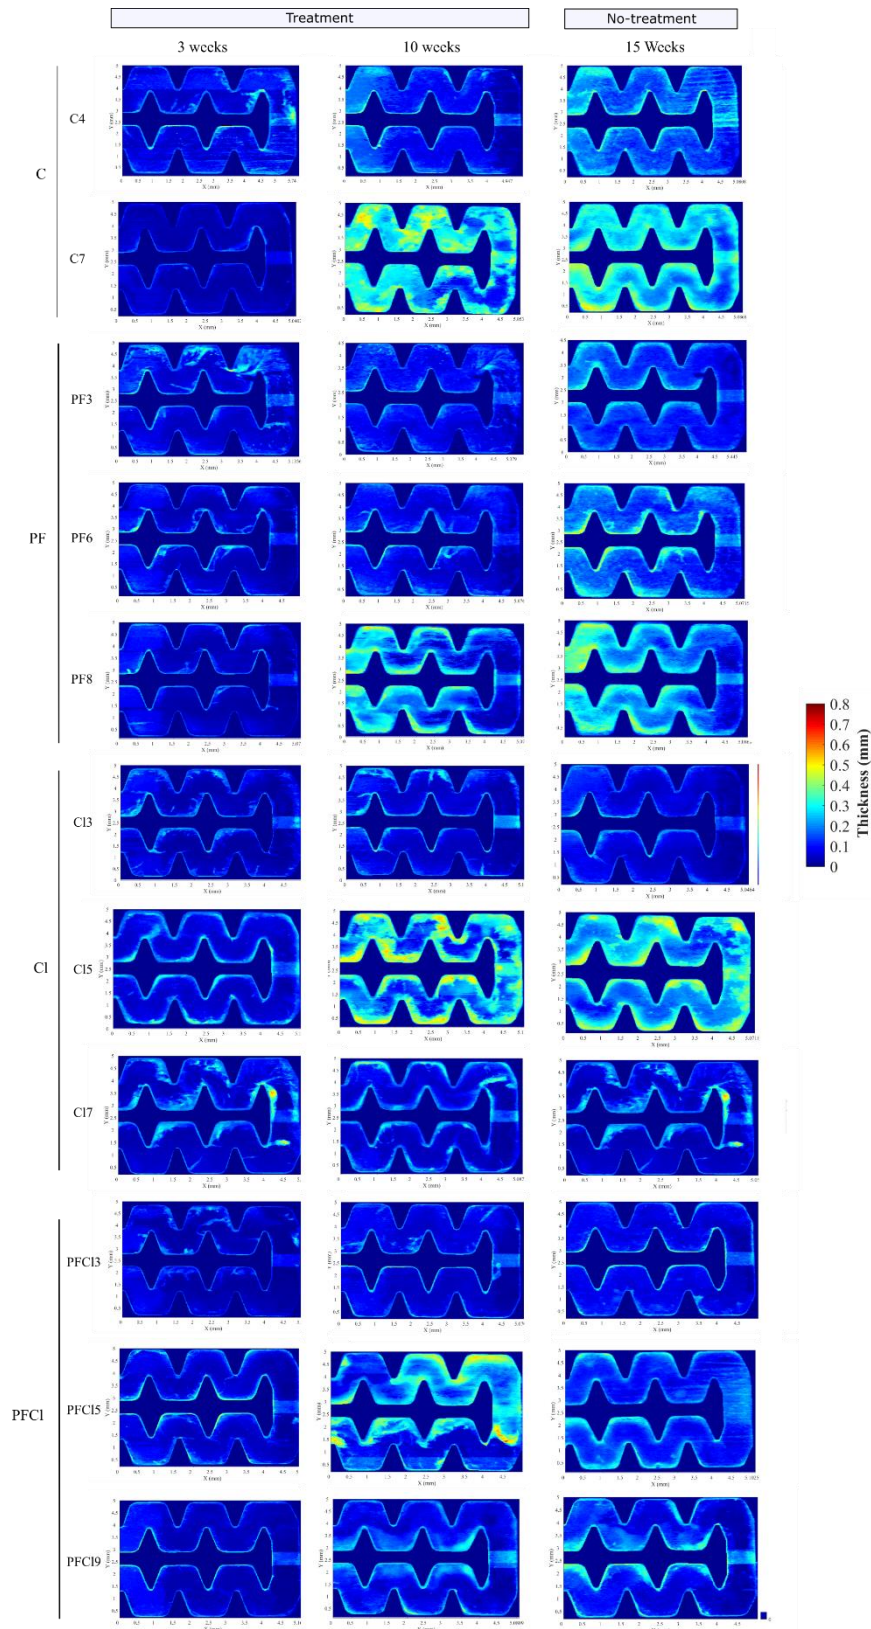

1047

1048 **Figure S5 Biofilm thickness at the return of drippers under the C (Control), PF (Pressure**  
1049 **flushing), CI (Chlorination) and PFCI (Pressure flushing/Chlorination) conditions**  
1050 **measured at 3, 10 and 15 weeks. The drippers presented are those also analysed by 16S rRNA**  
1051 **sequencing at 104 days.**

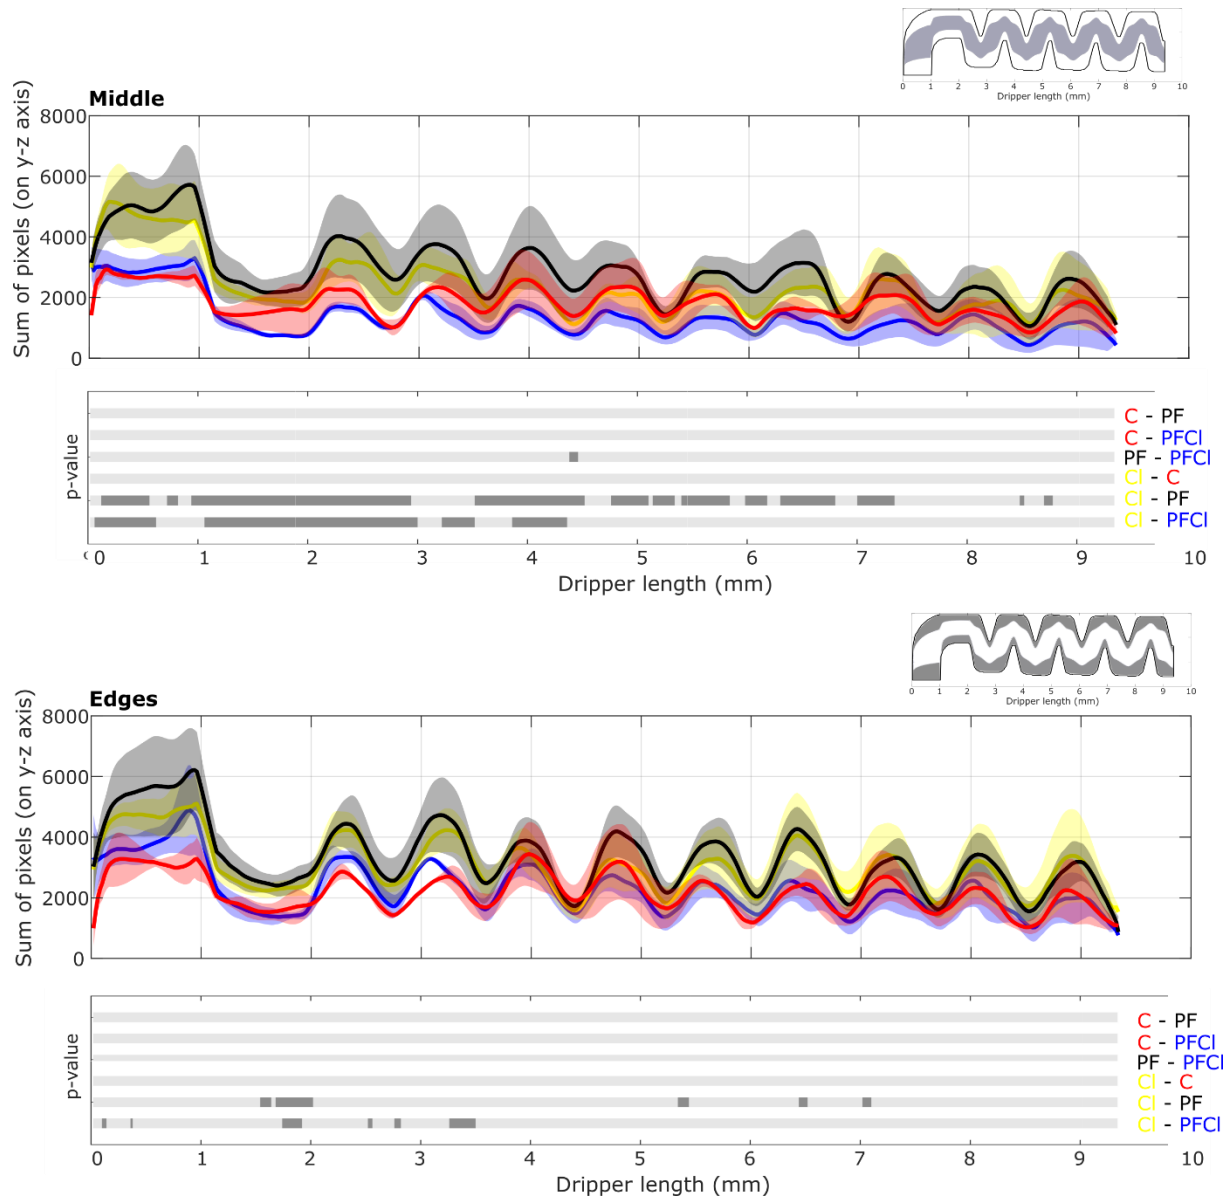

1052

1053 **Figure S6 Mean number of pixels associated with the biofilm mass (and standard**  
1054 **deviation) in the middle and edges of the inlet dripper channel after one month without**  
1055 **cleaning.** Control (C-●), Pressure flushing (PF-●), Chlorination (Cl-●) and Pressure flushing  
1056 combined with Chlorination (PFCI-●); n=6 per condition. P-value graphs show the results of  
1057 the Wilcoxon tests with □: non-significant, ■: p<0.1, ■: p<0.05.

1058

1059

1060

1061

1062 **Table S1 Top abundant genera (<3%, x10<sup>-1</sup>) of genera found specifically in one dripper type for each sampling time.–un: unclassified,**  
 1063 **\_ge: genus**

| Time (days) | Control (C)          |                    | Pressure flushing (PF) |                    | Chlorination & Pressure flushing (PFCI) |                    | Chlorination (CI)        |                    |
|-------------|----------------------|--------------------|------------------------|--------------------|-----------------------------------------|--------------------|--------------------------|--------------------|
|             | Genus                | Relative abundance | Genus                  | Relative abundance | Genus                                   | Relative abundance | Genus                    | Relative abundance |
| 29d         | Comamonadaceae_un    | 6.8 ± 1.2          | Comamonadaceae_un      | 7.3 ± 2.1          | Comamonadaceae_un                       | 21.7 ± 7.4         | <i>Azospira</i>          | 19.2 ± 6.2         |
|             | env.OPS_17_ge        | 6.1 ± 2.2          | <i>Dechloromonas</i>   | 6.7 ± 1.3          | <i>Flavobacterium</i>                   | 9.6 ± 1.3          | <i>Cloacibacterium</i>   | 14.7 ± 4.1         |
|             | <i>Fusibacter</i>    | 5.7 ± 1            | env.OPS_17_ge          | 5.1 ± 1.3          | <i>Dechloromonas</i>                    | 5.6 ± 3.1          | Comamonadaceae_un        | 13.9 ± 3           |
|             | <i>Azospira</i>      | 5 ± 1.6            | <i>Terrimonas</i>      | 4.6 ± 1            | env.OPS_17_ge                           | 5.5 ± 3            | <i>Flavobacterium</i>    | 12.4 ± 4.7         |
|             | <i>Pseudomonas</i>   | 4.9 ± 0.4          | <i>Fusibacter</i>      | 4.4 ± 0.2          | <i>Cloacibacterium</i>                  | 4.9 ± 1.3          | <i>Pseudoxanthomonas</i> | 5.1 ± 3            |
|             | <i>Dechloromonas</i> | 4.9 ± 1.3          | <i>Pseudomonas</i>     | 4.4 ± 0.9          | <i>Pseudomonas</i>                      | 4.4 ± 1.6          | <i>Dechloromonas</i>     | 4.7 ± 2            |
|             | <i>Terrimonas</i>    | 4.1 ± 1.5          | <i>Flavobacterium</i>  | 3.7 ± 0.5          |                                         |                    | Comamonadaceae_un        | 15.2 ± 1.1         |
| 71d         | uncultured_ge        | 6.5 ± 1.1          | <i>Terrimonas</i>      | 7.2 ± 2.2          | Comamonadaceae_un                       | 22.5 ± 3.8         | <i>Azospira</i>          | 8 ± 1.1            |
|             | <i>Terrimonas</i>    | 5.7 ± 0.9          | <i>Dechloromonas</i>   | 6.5 ± 2.5          | <i>Fusibacter</i>                       | 8.1 ± 3.6          | <i>Flavobacterium</i>    | 6.3 ± 0.9          |
|             | <i>Denitratisoma</i> | 5.4 ± 0.4          | uncultured_ge          | 6.3 ± 3            | <i>Azospira</i>                         | 4.8 ± 1.2          | <i>Fusibacter</i>        | 5.8 ± 1.1          |
|             | <i>Dechloromonas</i> | 4.1 ± 0.7          | Comamonadaceae_un      | 5.3 ± 3            | <i>Pseudomonas</i>                      | 4.5 ± 0.4          | WCHB1-32_ge              | 4.7 ± 0.1          |
|             | Run-SP154_ge         | 4.1 ± 1.2          | <i>Denitratisoma</i>   | 5.2 ± 0.1          |                                         |                    | <i>Paludibacter</i>      | 4.5 ± 0.8          |
|             | Comamonadaceae_un    | 3.6 ± 0.6          | uncultured             | 3.9 ± 0.7          |                                         |                    |                          |                    |
|             |                      |                    | Run-SP154_ge           | 3.6 ± 0.8          |                                         |                    |                          |                    |
| 104d        | <i>Dechloromonas</i> | 12.3 ± 3.5         | <i>Dechloromonas</i>   | 5.8 ± 1.4          | Comamonadaceae_un                       | 9.1 ± 1            | Comamonadaceae_un        | 14.3 ± 2.2         |
|             | <i>Aquabacterium</i> | 8.4 ± 0.3          | <i>Denitratisoma</i>   | 5.1 ± 0.6          | <i>Dechloromonas</i>                    | 7.4 ± 2.2          | Coriobacteriaceae_un     | 7.8 ± 0            |
|             | <i>Herpetosiphon</i> | 7 ± 0              | <i>Competibacter</i>   | 4.5 ± 1.2          | uncultured                              | 6.8 ± 1.4          | uncultured_ge            | 4.5 ± 0.8          |
|             | Comamonadaceae_un    | 6.6 ± 0.7          | uncultured             | 4 ± 0.6            | uncultured_ge                           | 4.8 ± 0.1          | Christensenellaceae_un   | 3.9 ± 0            |
|             | Coriobacteriaceae_un | 6.5 ± 0            | uncultured_ge          | 4 ± 0.8            | Christensenellaceae_un                  | 3.5 ± 0            | <i>Thiocapsa</i>         | 3.6 ± 0            |
|             | uncultured           | 5.8 ± 1            | Run-SP154_ge           | 3.9 ± 0.5          |                                         |                    | Run-SP154_ge             | 3.3 ± 0.1          |
|             |                      |                    | Candidatus_Nitrotoga   | 3.8 ± 0.4          |                                         |                    | uncultured               | 3.2 ± 0.2          |
|             |                      |                    | <i>Terrimonas</i>      | 3.8 ± 0.5          |                                         |                    |                          |                    |

1064

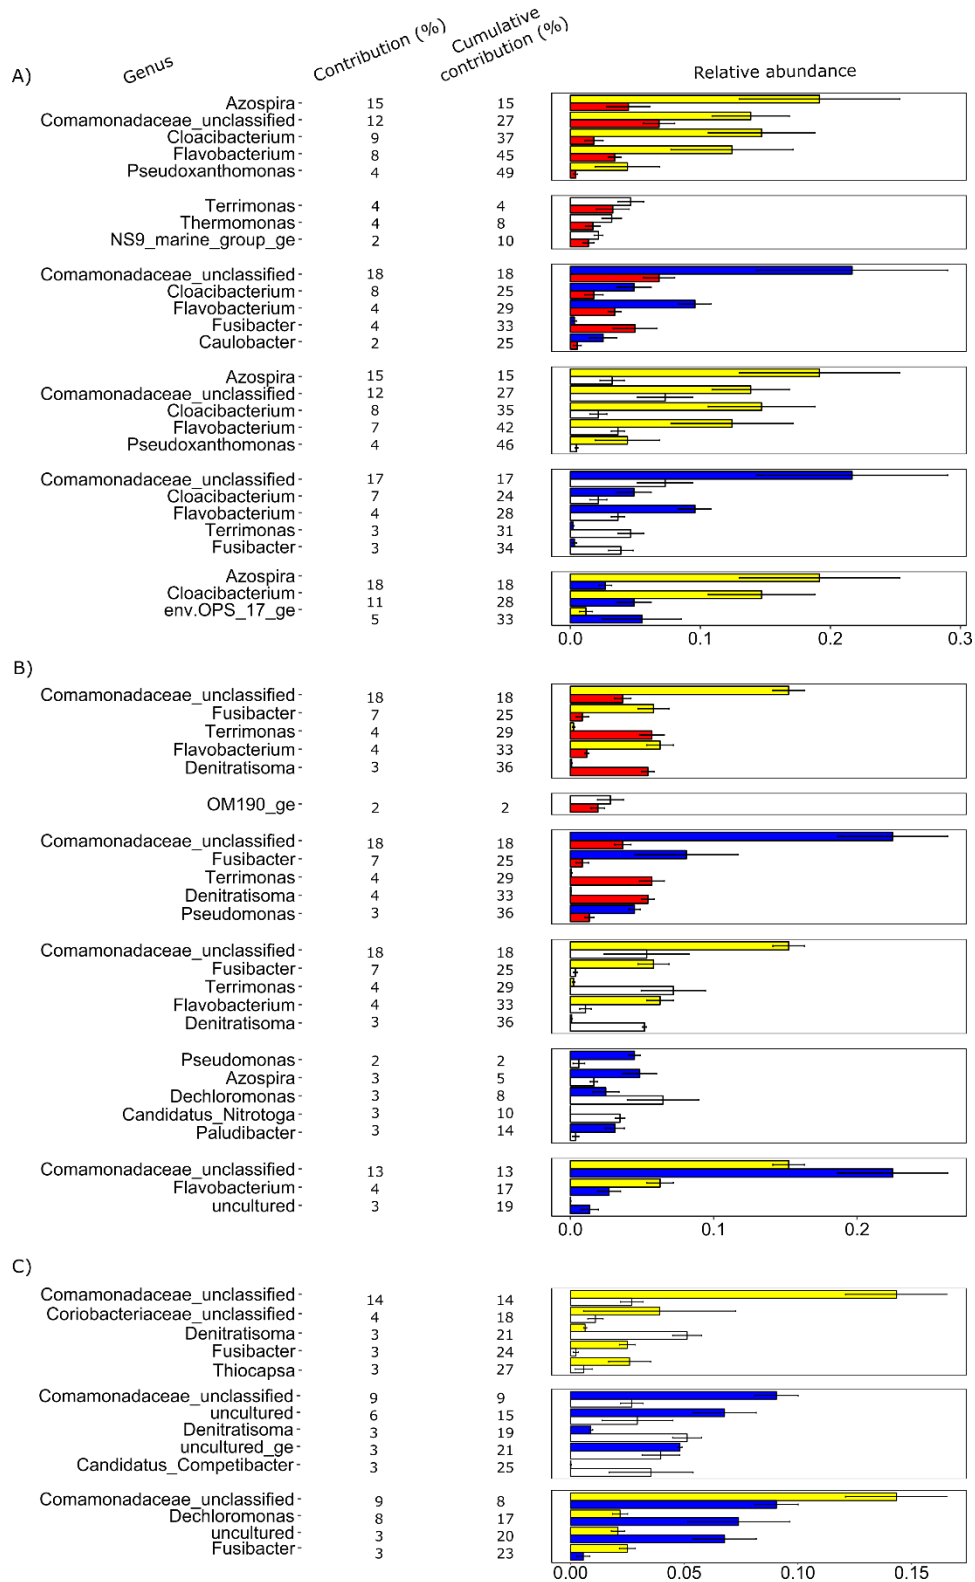

1065

1066 **Figure S8 Most influential bacterial genera in discriminating between 2 conditions**  
 1067 **(SIMPER analysis).** Control (●), Pressure flushing (○), Chlorination (●) and Pressure  
 1068 flushing/Chlorination (●).

1069

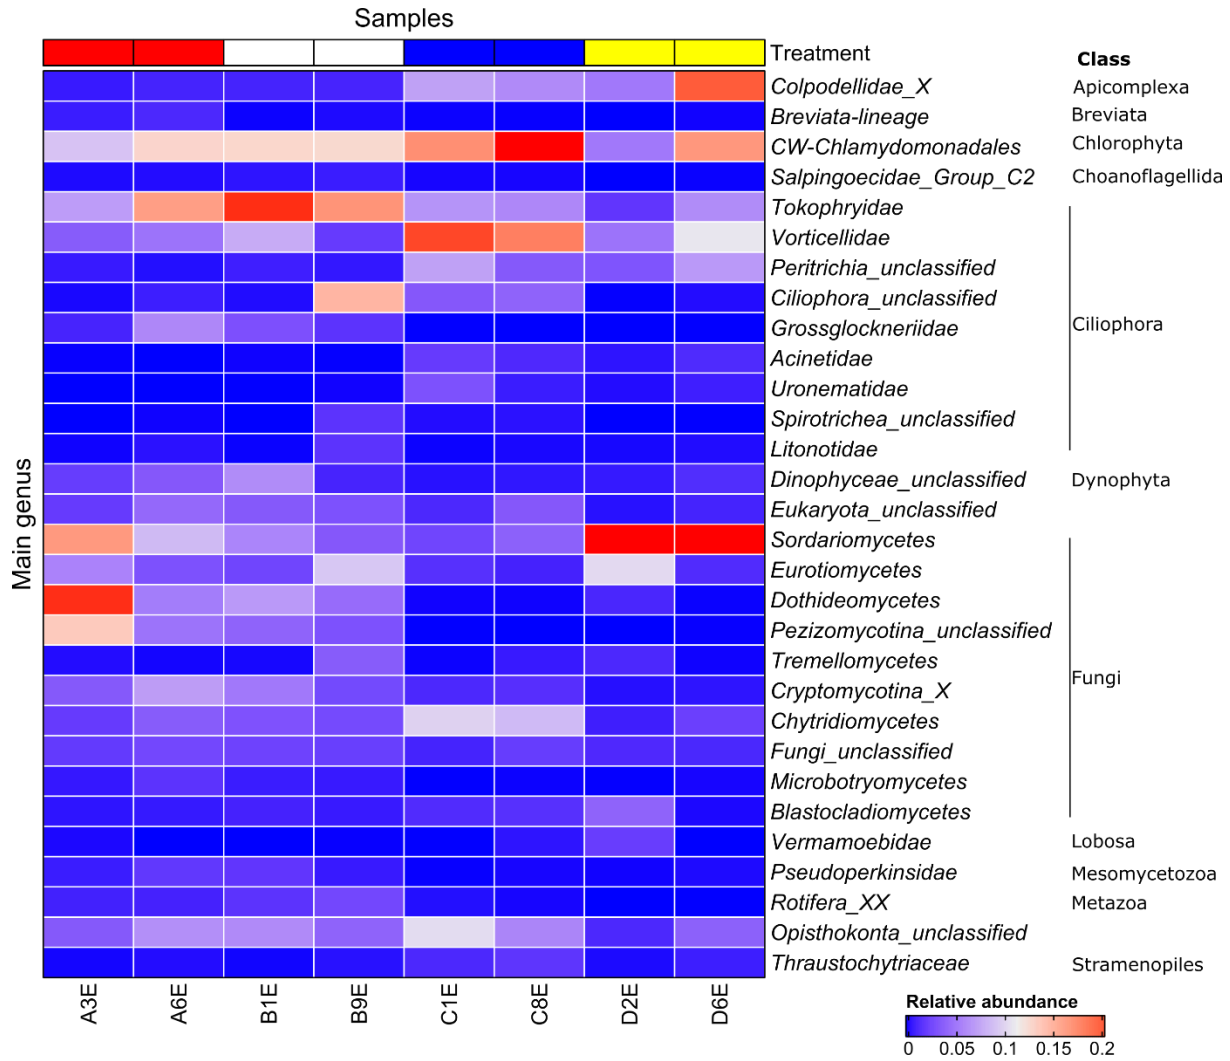

1070

1071 **Figure S9 Heat map of eukaryotes genera from dripper biofilms** Genera in top thirty relative  
 1072 abundance are shown. Control (●), Pressure flushing (○), Chlorination (●) and Pressure  
 1073 flushing/Chlorination (●).

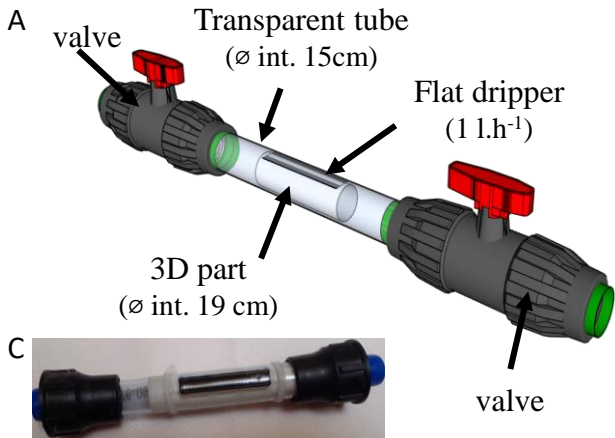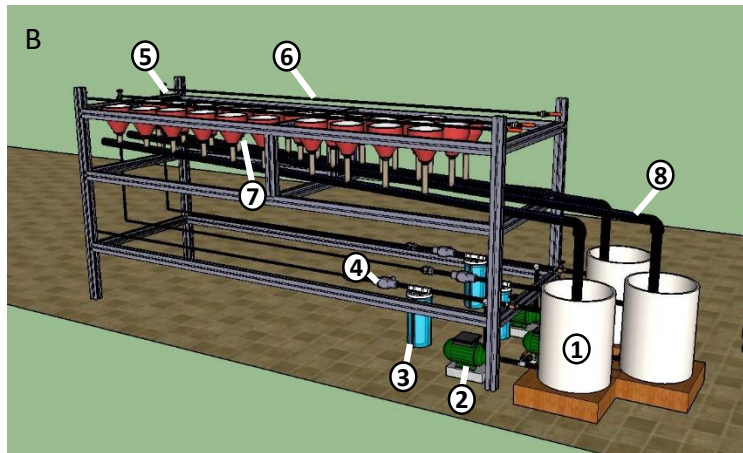

**Figure 1. Dripper system (A, C) and test bench (B).** The drippers were placed in a transparent tube to enable optical measurements. The test bench was composed of 1. a tank (60l); 2. a water pump; 3. a 0.13mm mesh screen filter; 4. a pressure reducer; 5. a pressure gauge; 6. the drip line with an emitter system located at 10 cm intervals; 7. a collector; 8. a gutter.



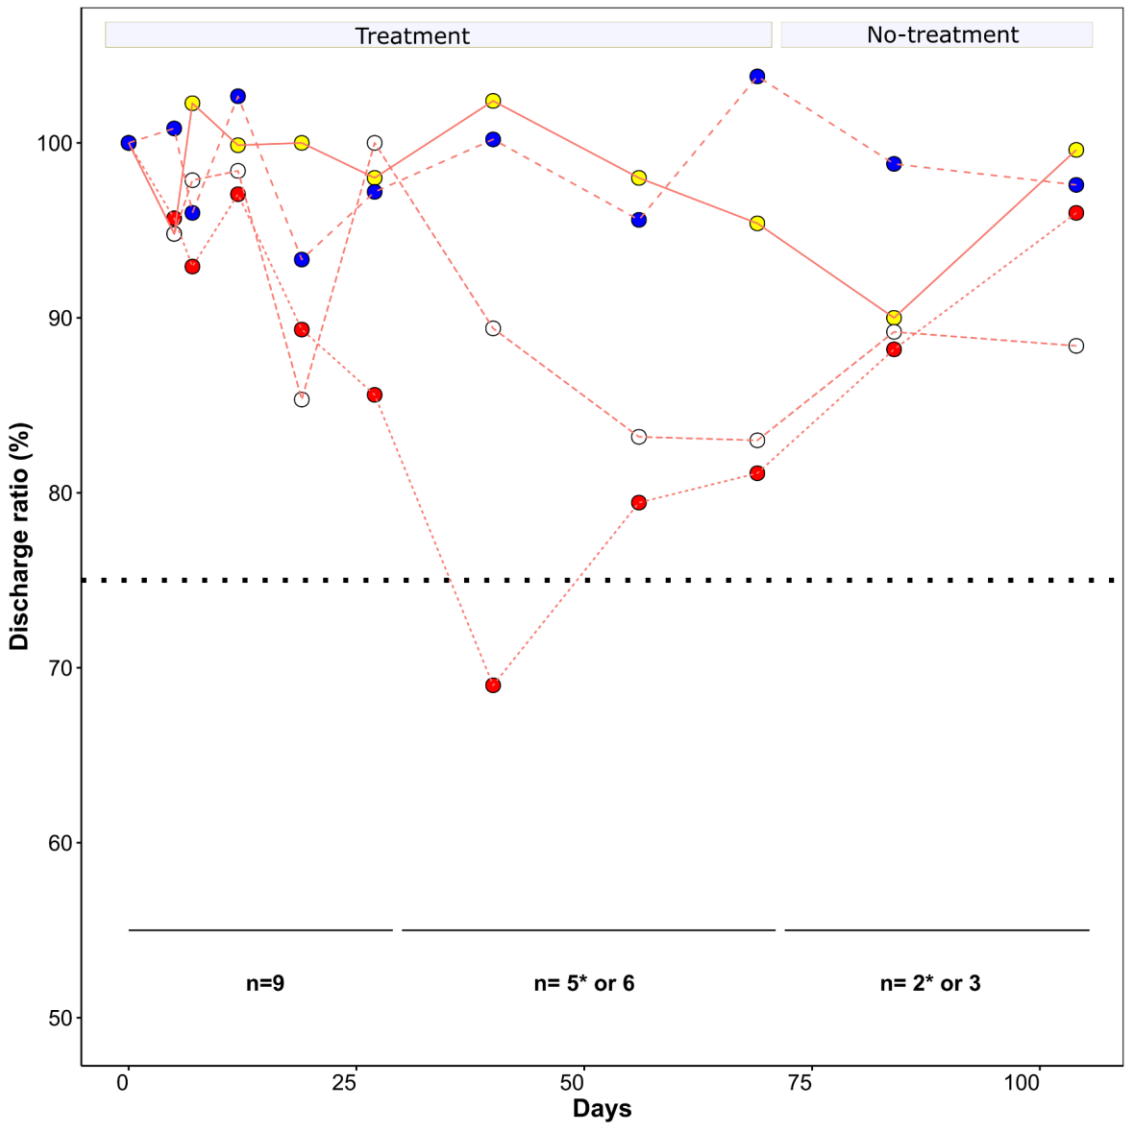

**Figure 2 Discharge ratio variation according to the cleaning procedure used.** Control (●), Pressure Flushing (○), Chlorination (●) and Pressure Flushing combined with Chlorination (●). The drippers were considered as clogged when the discharge was less than 75% (dotted line). *n* corresponds to the number of drippers for each line (\* : data control line).

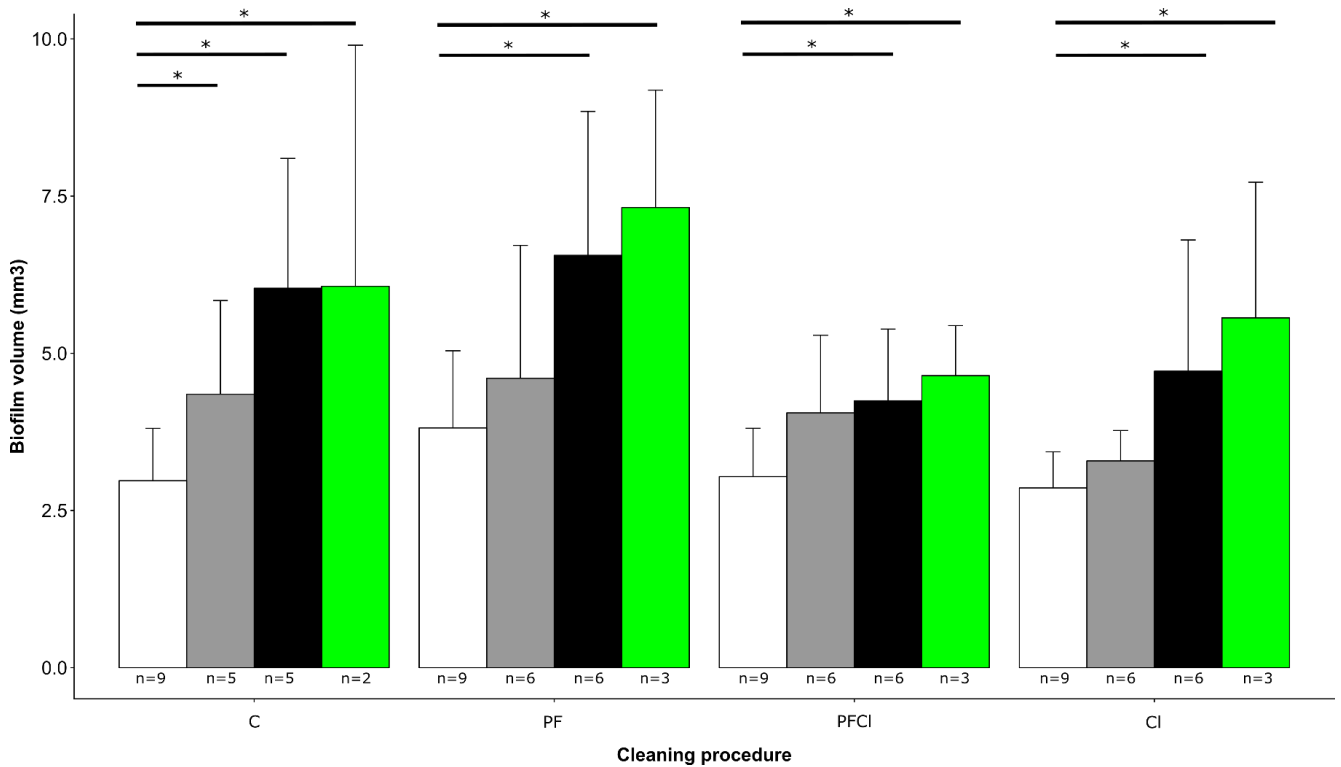

**Figure 3 Evolution over time of the biofilm volume according to the cleaning method used (at weeks 3, 6, 10 (cleaning phase) and 15 (no-cleaning phase); white, grey, dark grey and green respectively). C= control, PF= Pressure flushing, PFCI= Pressure flushing combined with chlorination, CI= Chlorination. *n* refers to the number of drippers. The biofouling volume was quantified as the sum of the fouling volumes developed for the inlet, return and outlet areas. \* shows significant differences (p-value < 0.05) on the conover test.**

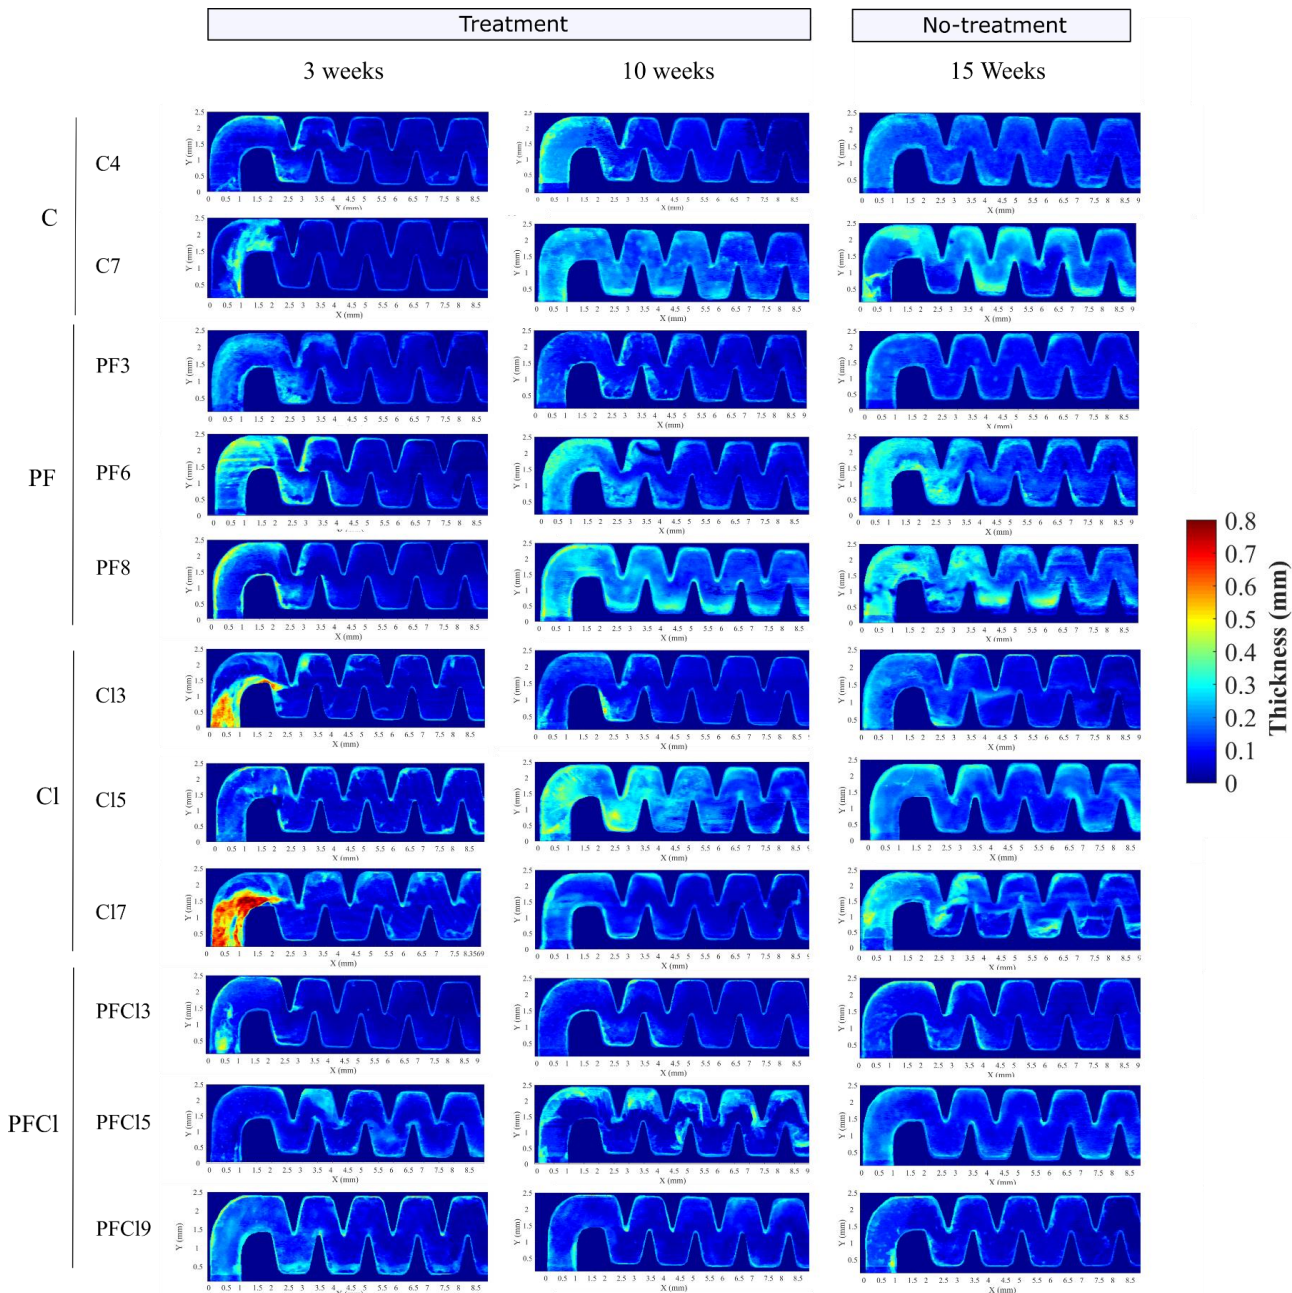

**Figure 4 Biofilm thickness at the inlet of drippers under C (Control), PF (Pressure flushing), Cl (Chlorination) and PFCI (Pressure flushing/Chlorination) conditions measured after 3, 10 and 15 weeks. The drippers presented are those also analysed by high-throughput sequencing at 104 days.**

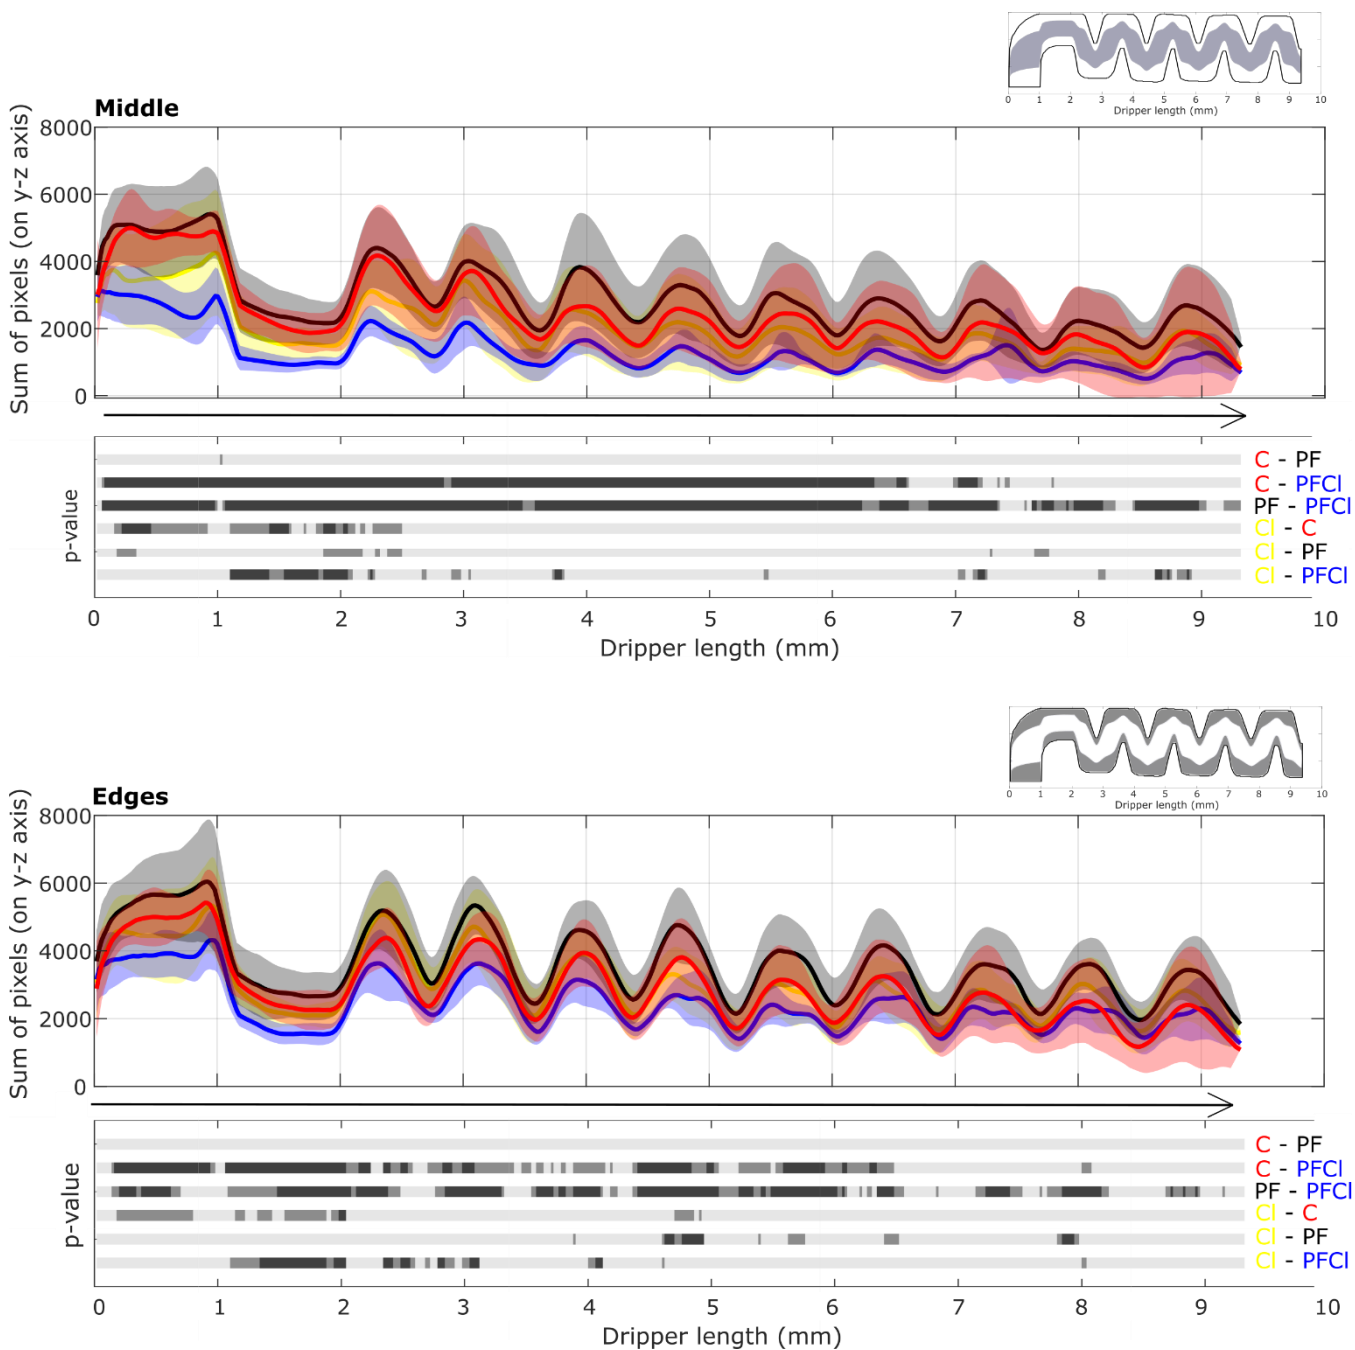

**Figure 5 Means and standard deviation of pixels associated with biofouling in the middle and on the edges of the inlet dripper channel after 10 weeks of treatment.** For each position of x, pixels in y-z are summed. Grey areas on inlet schemes at right-top indicate the zone of interest. Control (C-●), Pressure flushing (PF-●), Chlorination (Cl-●) and Pressure flushing combined with Chlorination (PFCI-●); the arrow indicates the direction of the flow along the channel; n=6 per condition. P-value graphs show the results of the Wilcoxon tests with ■: non-significant, ■: p<0.1, ■: p<0.05.

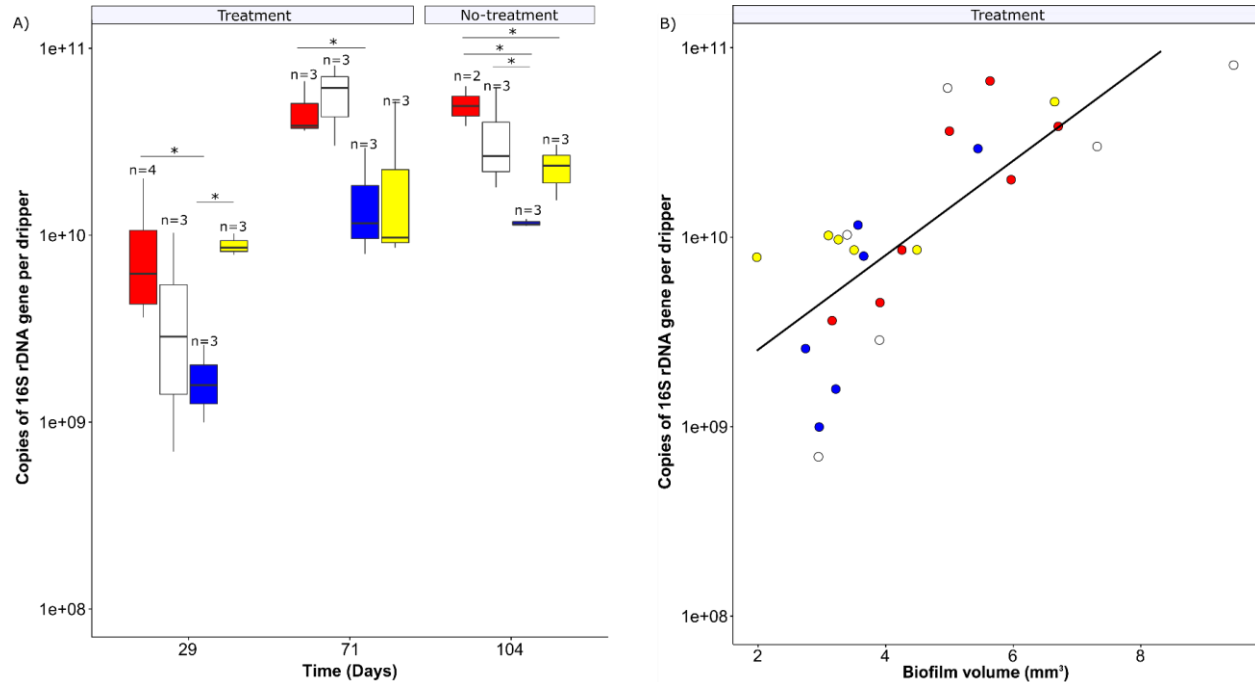

**Figure 6 Evolution of the bacterial quantity by dripper according to the cleaning method used (left) and the biofilm volume (right). Control (●), Pressure flushing (○), Chlorination (●) and Pressure flushing combined with Chlorination (●). The biofouling volume was quantified as the sum of the fouling at the inlet, return and outlet areas. \* indicates significant differences (conover-test, p-value < 0.05).**

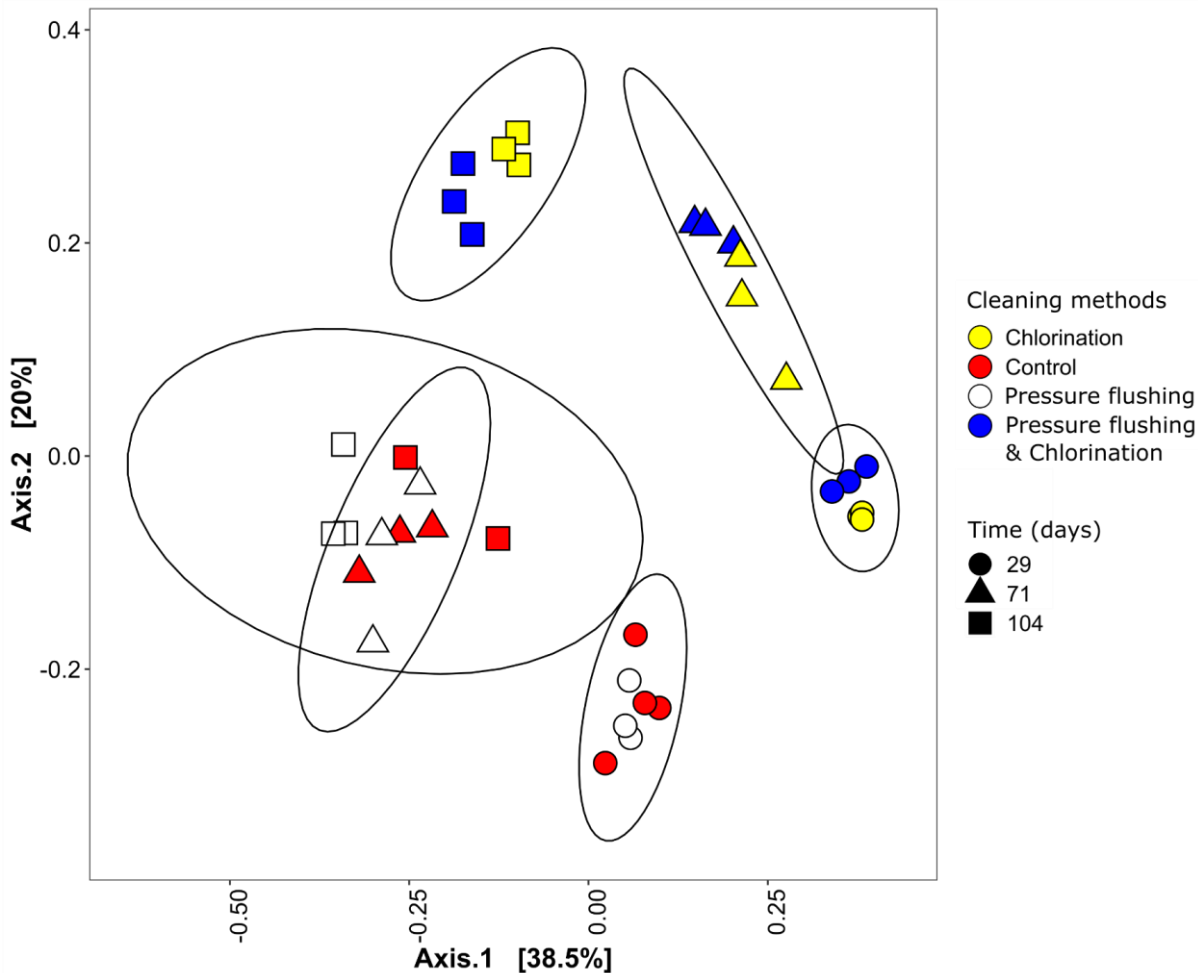

**Figure 7 Principal coordinate analysis (PCoA) of microbial communities from drifter biofilms at genus level.** The ellipsoids represent the 95% cut off similarity levels among samples.

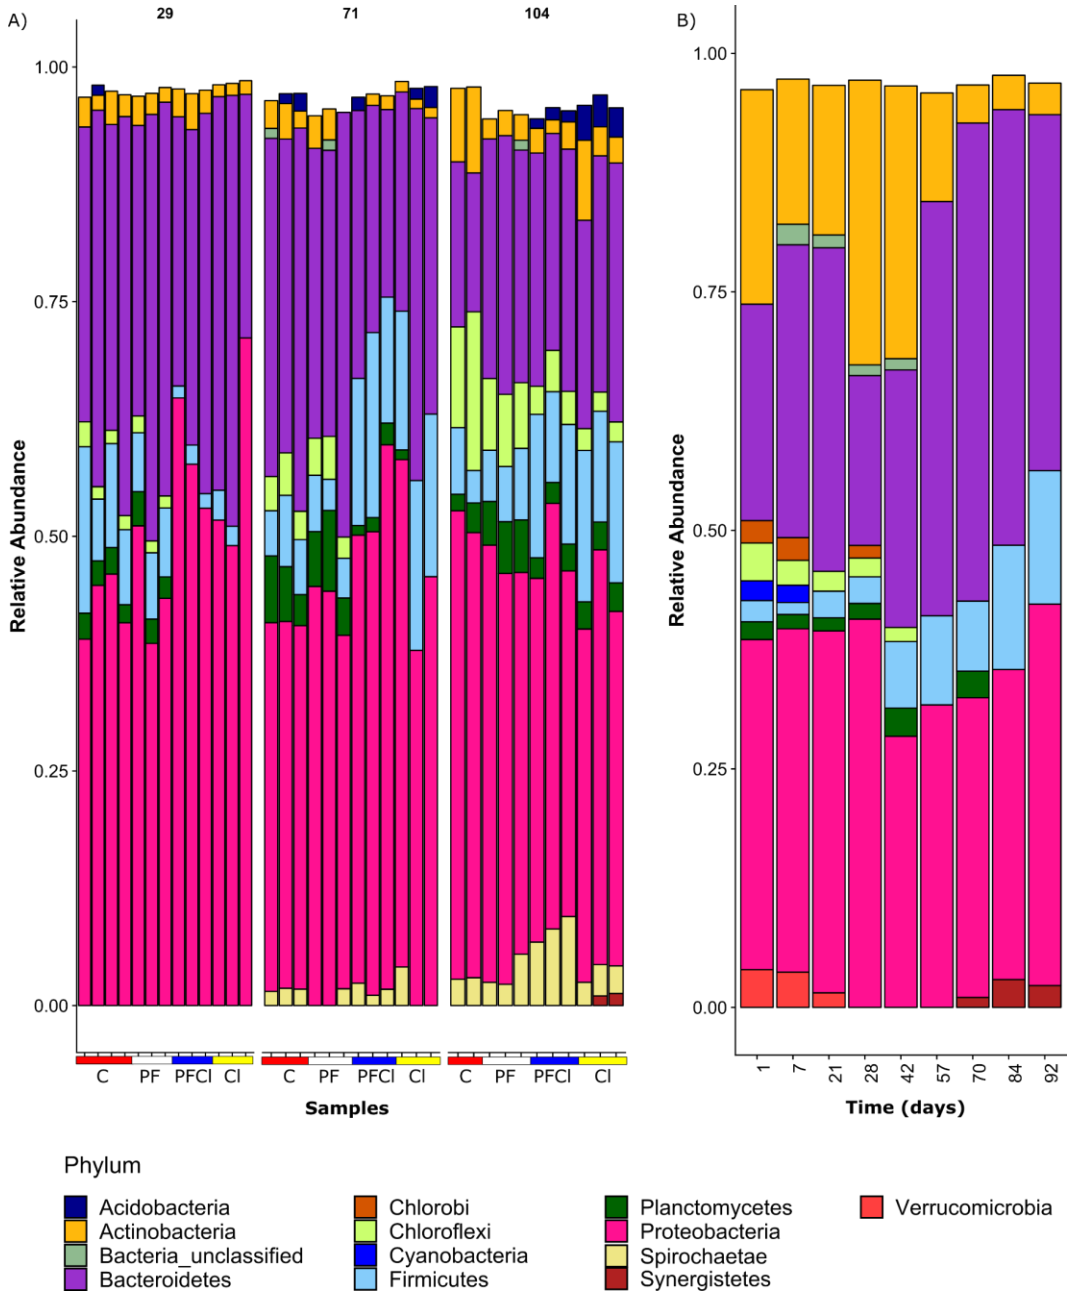

**Figure 8** Relative abundance of bacterial phyla (>1%) in dripper biofilms over time (A) and in reclaimed wastewater (B).

# Dripper

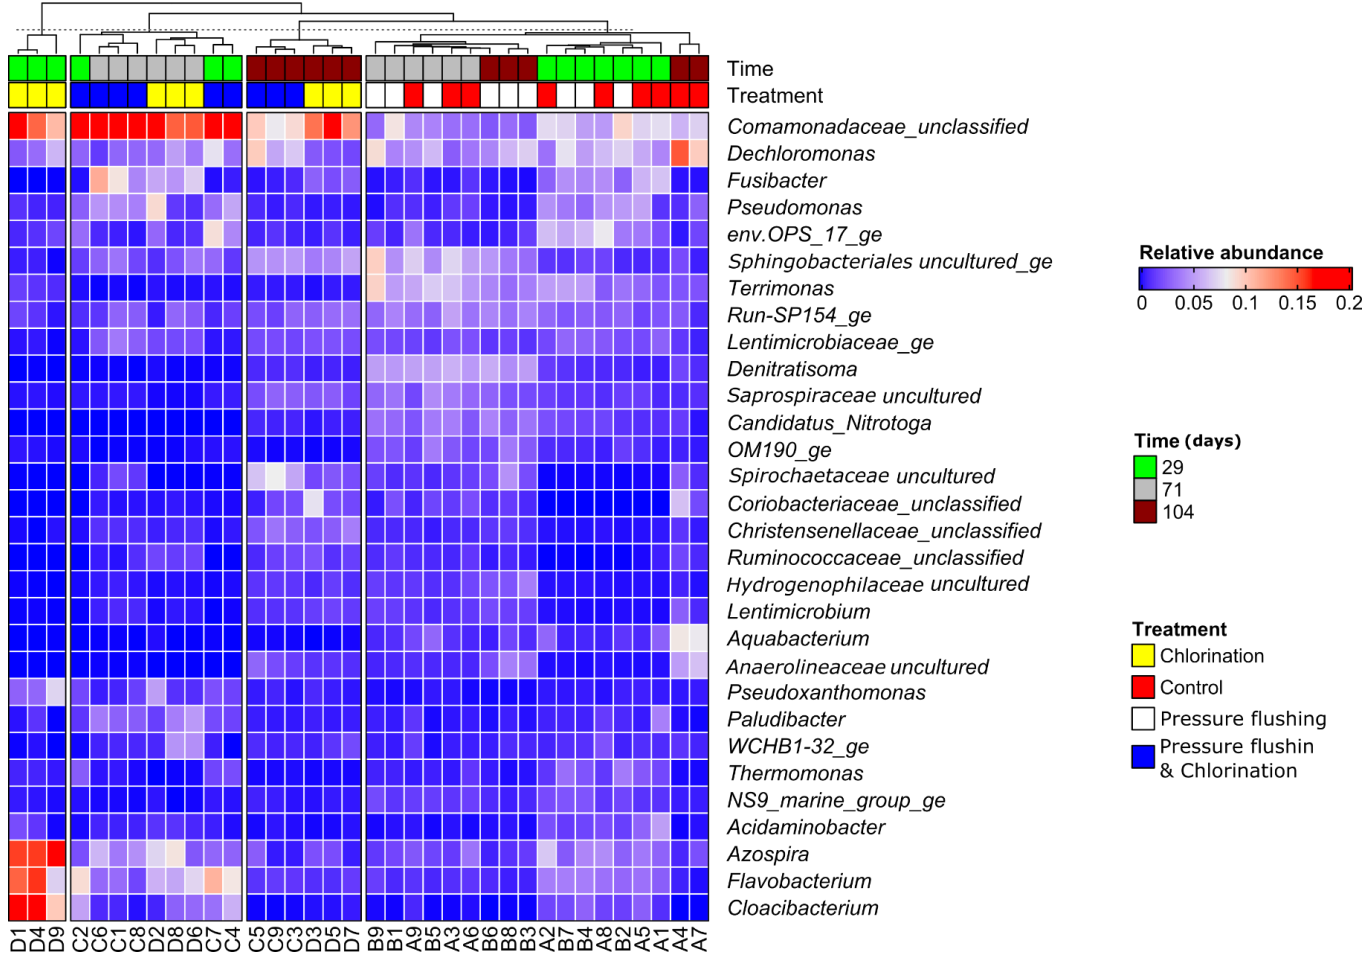

**Figure 9** Heat map of bacterial genera from dripper biofilms. Genera with the top 30 relative abundance are shown.
